# Supplementary material for: Altered gut microbiome composition by appendectomy contributes to colorectal cancer
Source: PubMed Central journal article supplement (PMC9918431; doi:10.1038/s41388-022-02569-3), 2022-12-20

**Supplementary Figure 1.** Overview of study design. The study was comprised of an epidemiological study on Cohort 1 (n=416,379) and fecal shotgun metagenomics sequencing study on Cohort 2 (n=513). The flowchart for the epidemiological study as well as the criteria for subject selection on Cohort 1 was illustrated in **(A)**. The Cohort 2 (n=513) was recruited for fecal shotgun metagenomics sequencing study and was filtered based on criteria as illustrated in **(B)**, resulting in a total of 314 samples with age and gender-matched appendectomy and control groups at 1:1 ratio (157 vs 157). CRC, colorectal cancer; IBD, inflammatory bowel diseases; OR, odds ratio.

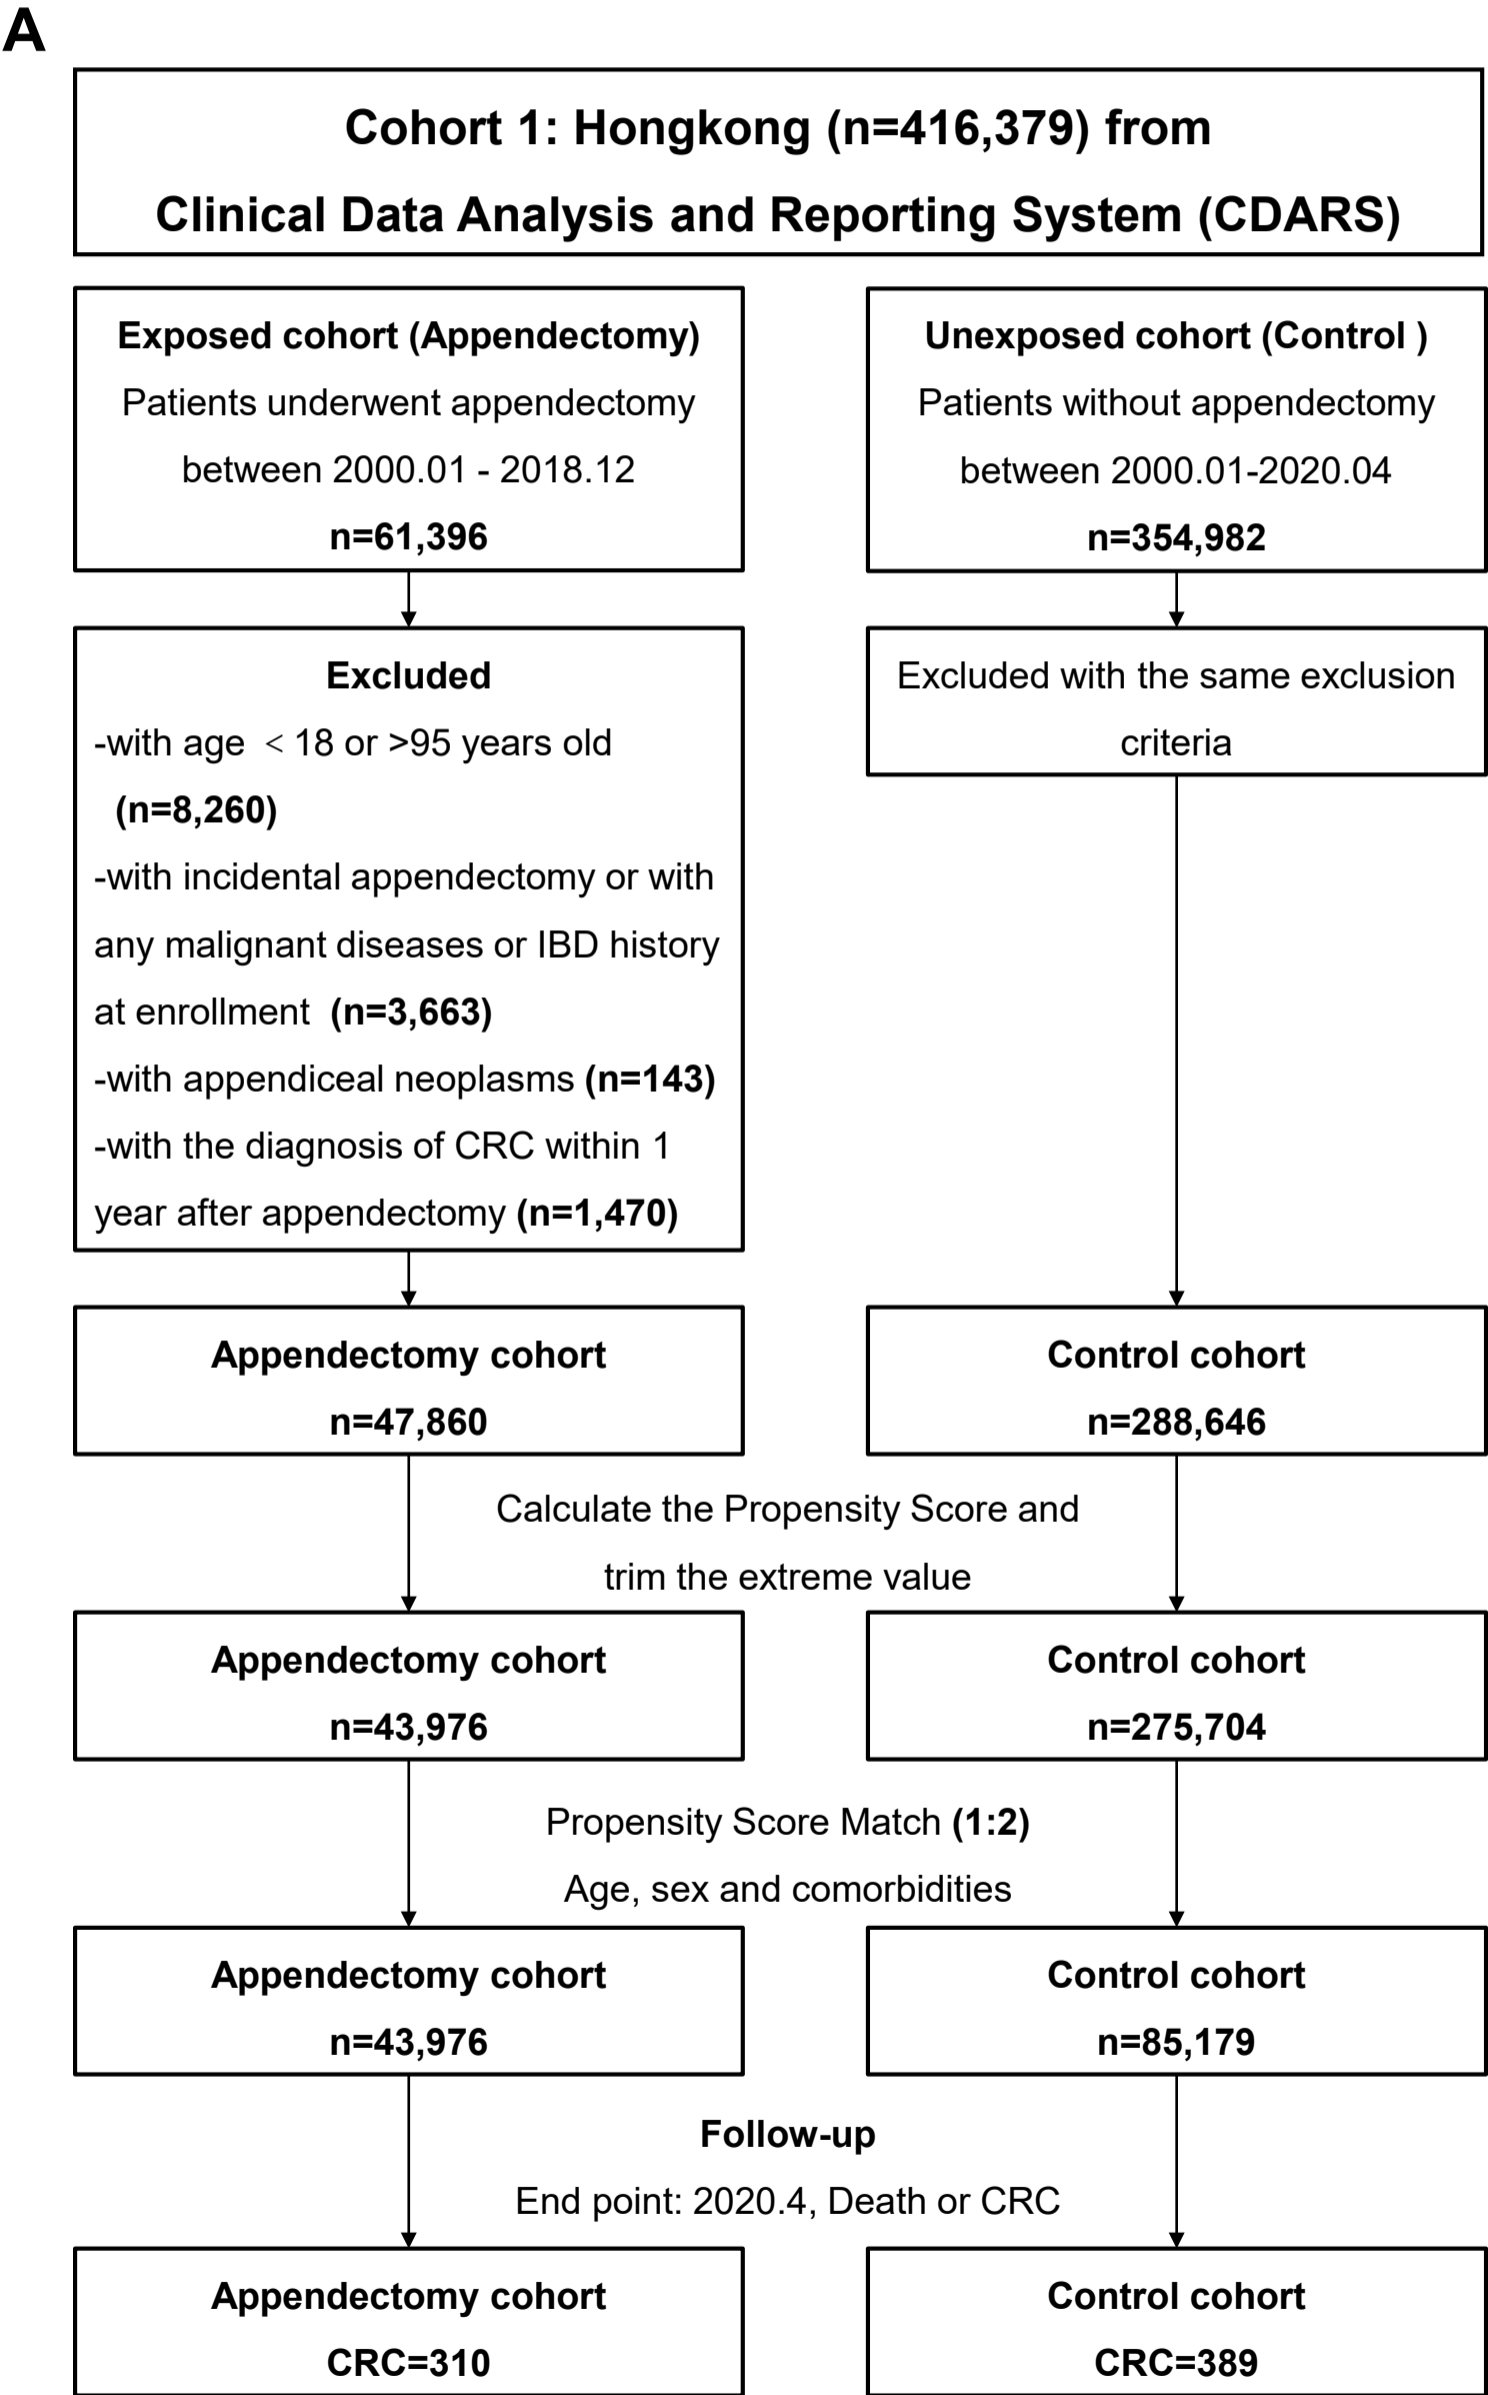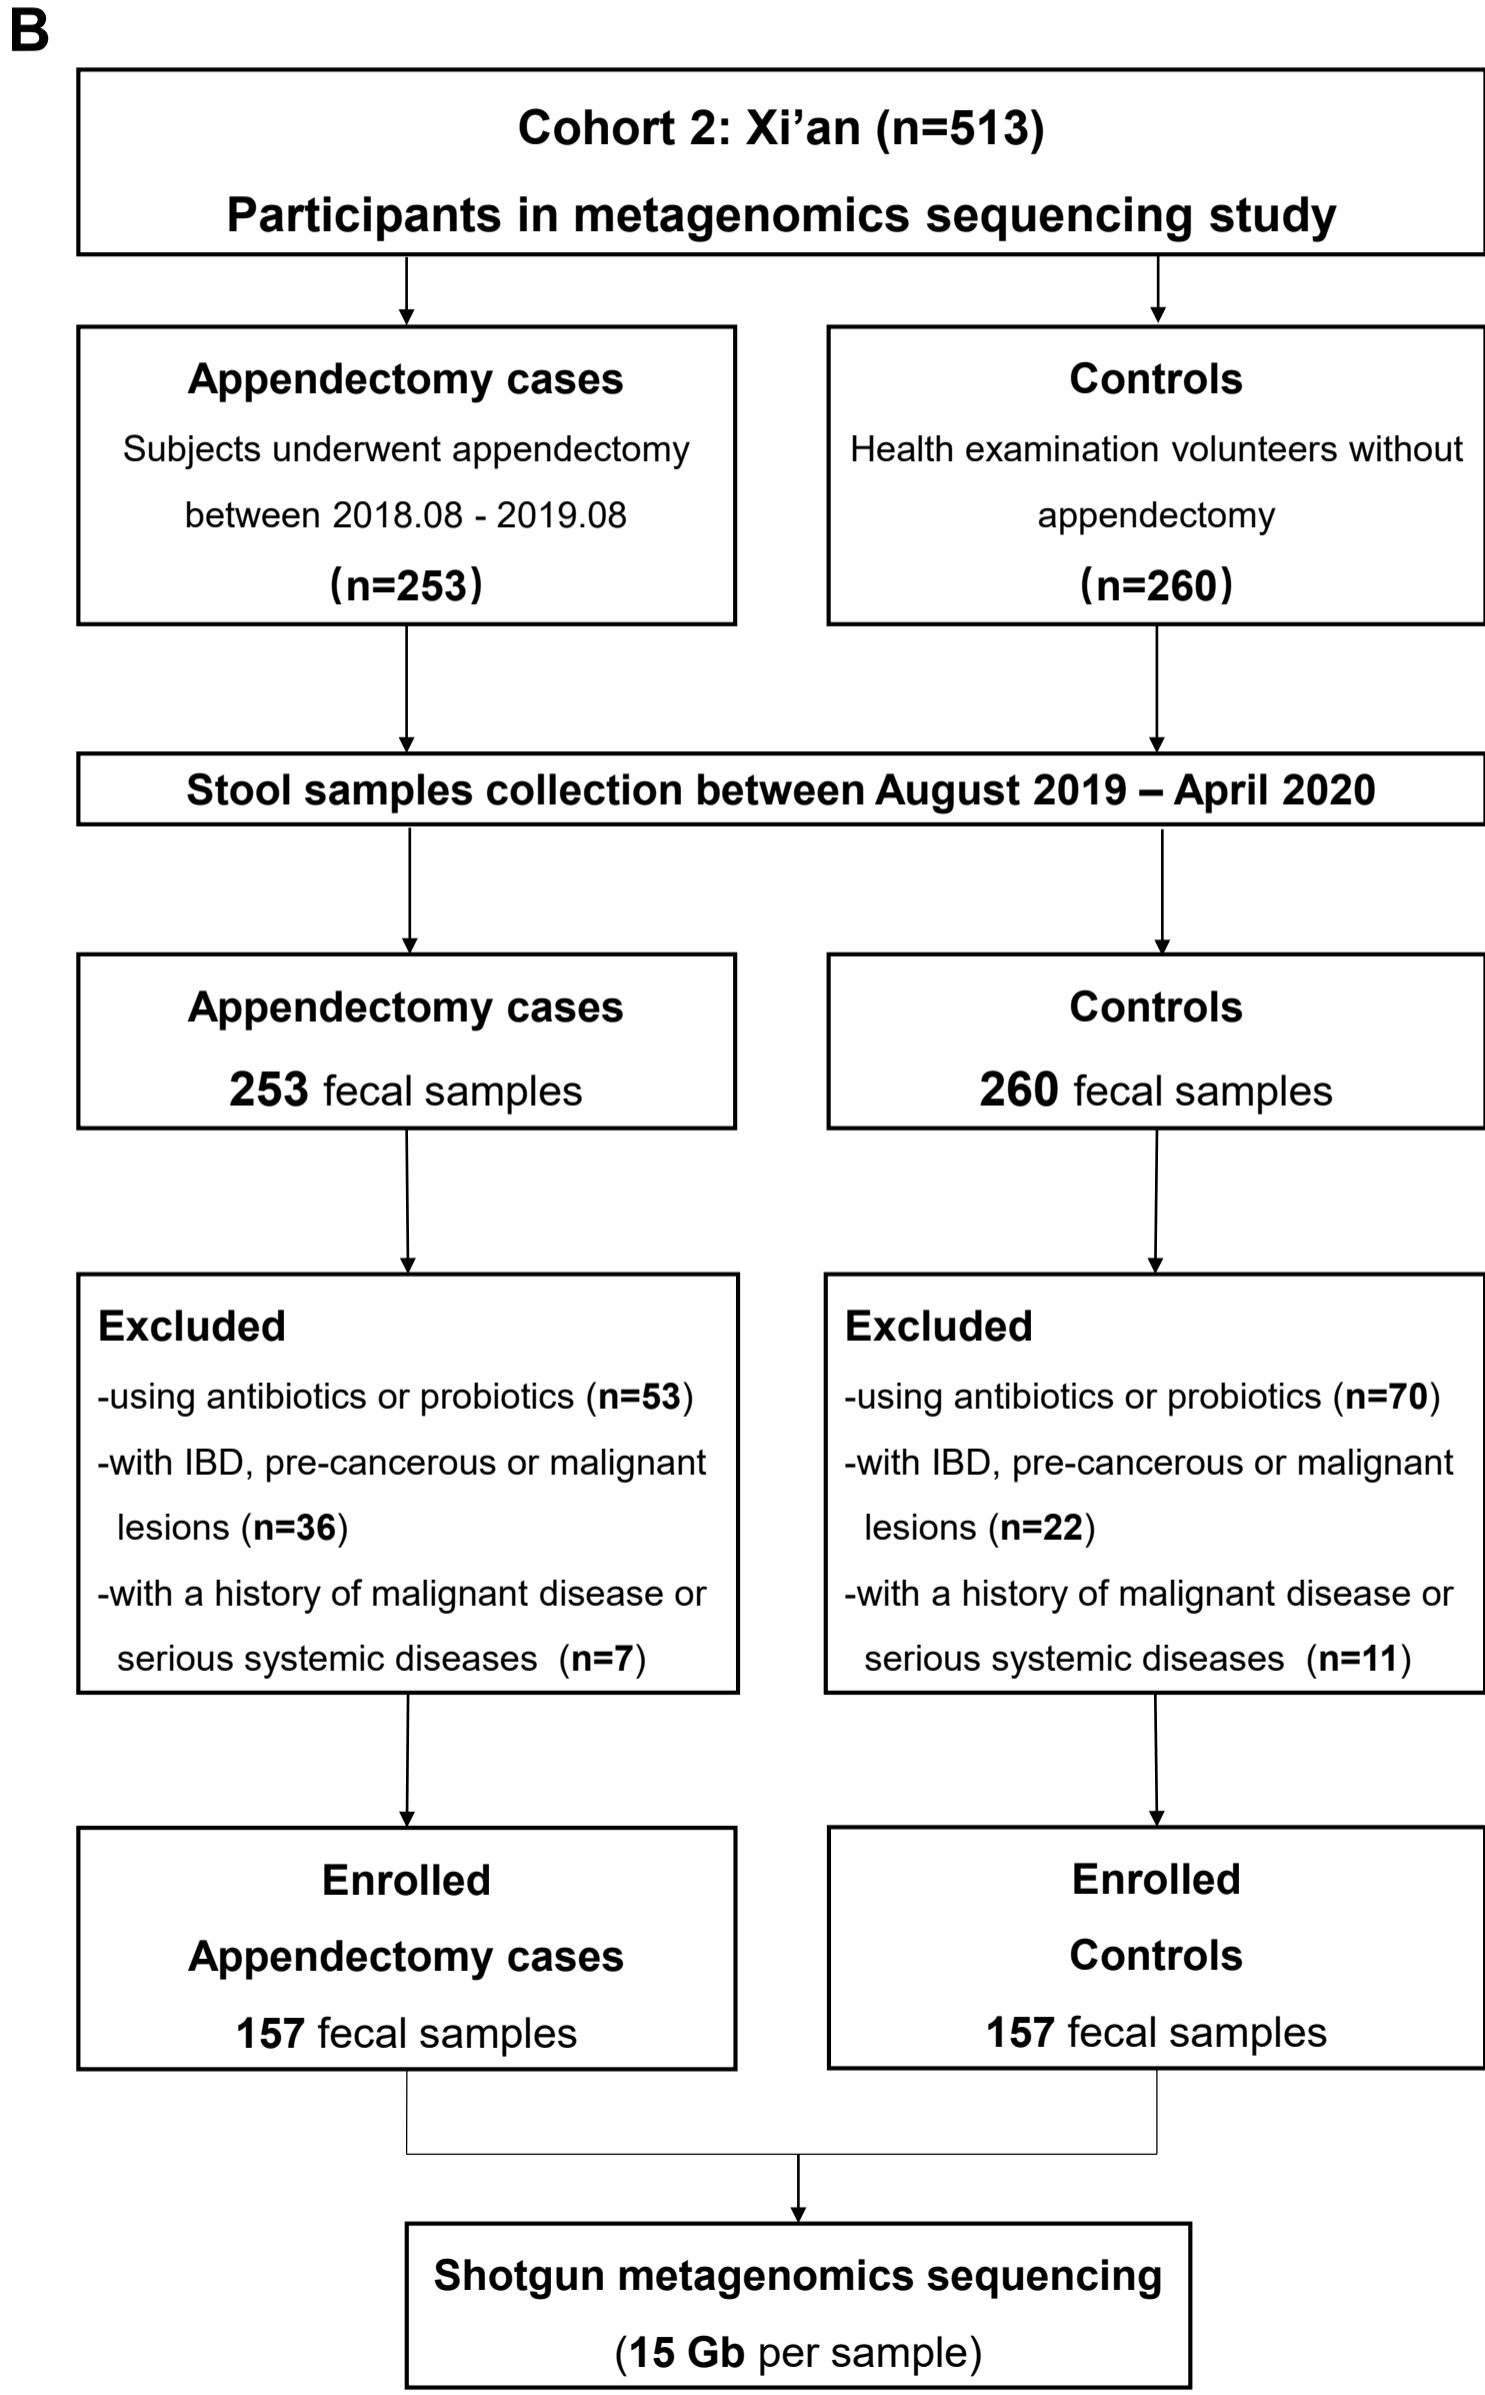

Supplement: 41388_2022_2569_MOESM2_ESM.pdf [file 41388_2022_2569_MOESM2_ESM.pdf]
