# Supplementary material for: Altered gut microbiome composition by appendectomy contributes to colorectal cancer
Source: PubMed Central journal article supplement (PMC9918431; doi:10.1038/s41388-022-02569-3), 2022-12-20

**Supplementary Figure 3.** The temporal trends of the adjusted SHR in appendectomy cases over the 20 follow-up years stratified by gender (A) and age (B).

**A**

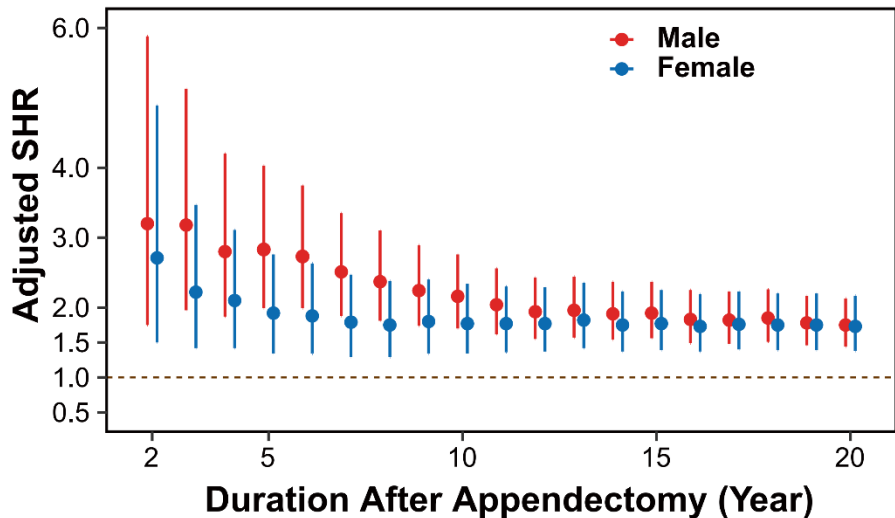

**B**

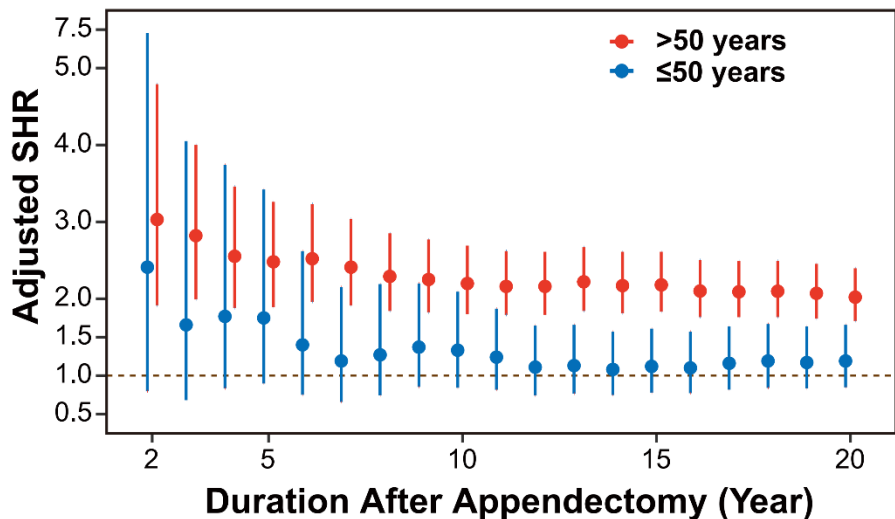

Supplement: 41388_2022_2569_MOESM4_ESM.pdf [file 41388_2022_2569_MOESM4_ESM.pdf]
