# Supplementary material for: Altered gut microbiome composition by appendectomy contributes to colorectal cancer
Source: PubMed Central journal article supplement (PMC9918431; doi:10.1038/s41388-022-02569-3), 2022-12-20

**Supplementary Figure 4. (A)** The alpha diversity for Shannon index and **(B)** beta diversity for principal coordinates analysis in different time points after appendectomy.

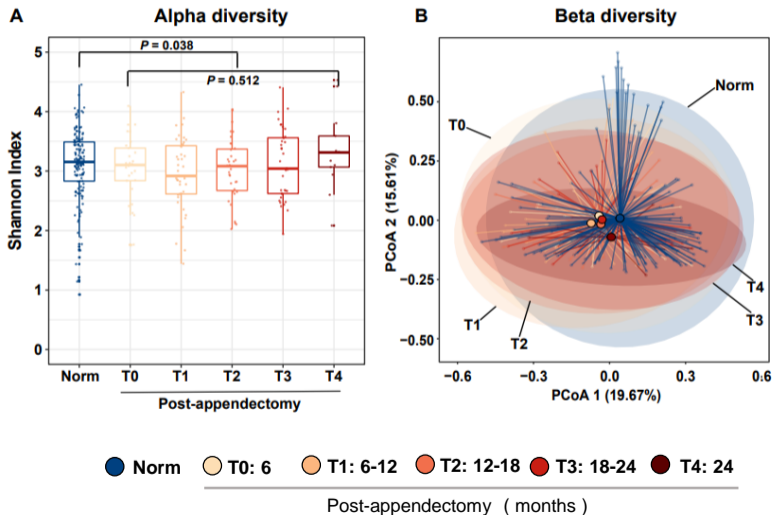

Supplement: 41388_2022_2569_MOESM5_ESM.pdf [file 41388_2022_2569_MOESM5_ESM.pdf]
