# Supplementary material for: Altered gut microbiome composition by appendectomy contributes to colorectal cancer
Source: PubMed Central journal article supplement (PMC9918431; doi:10.1038/s41388-022-02569-3), 2022-12-20

# Supplementary Figure 5. Relative abundance of selected appendectomy-enriched bacterial species in all subjects

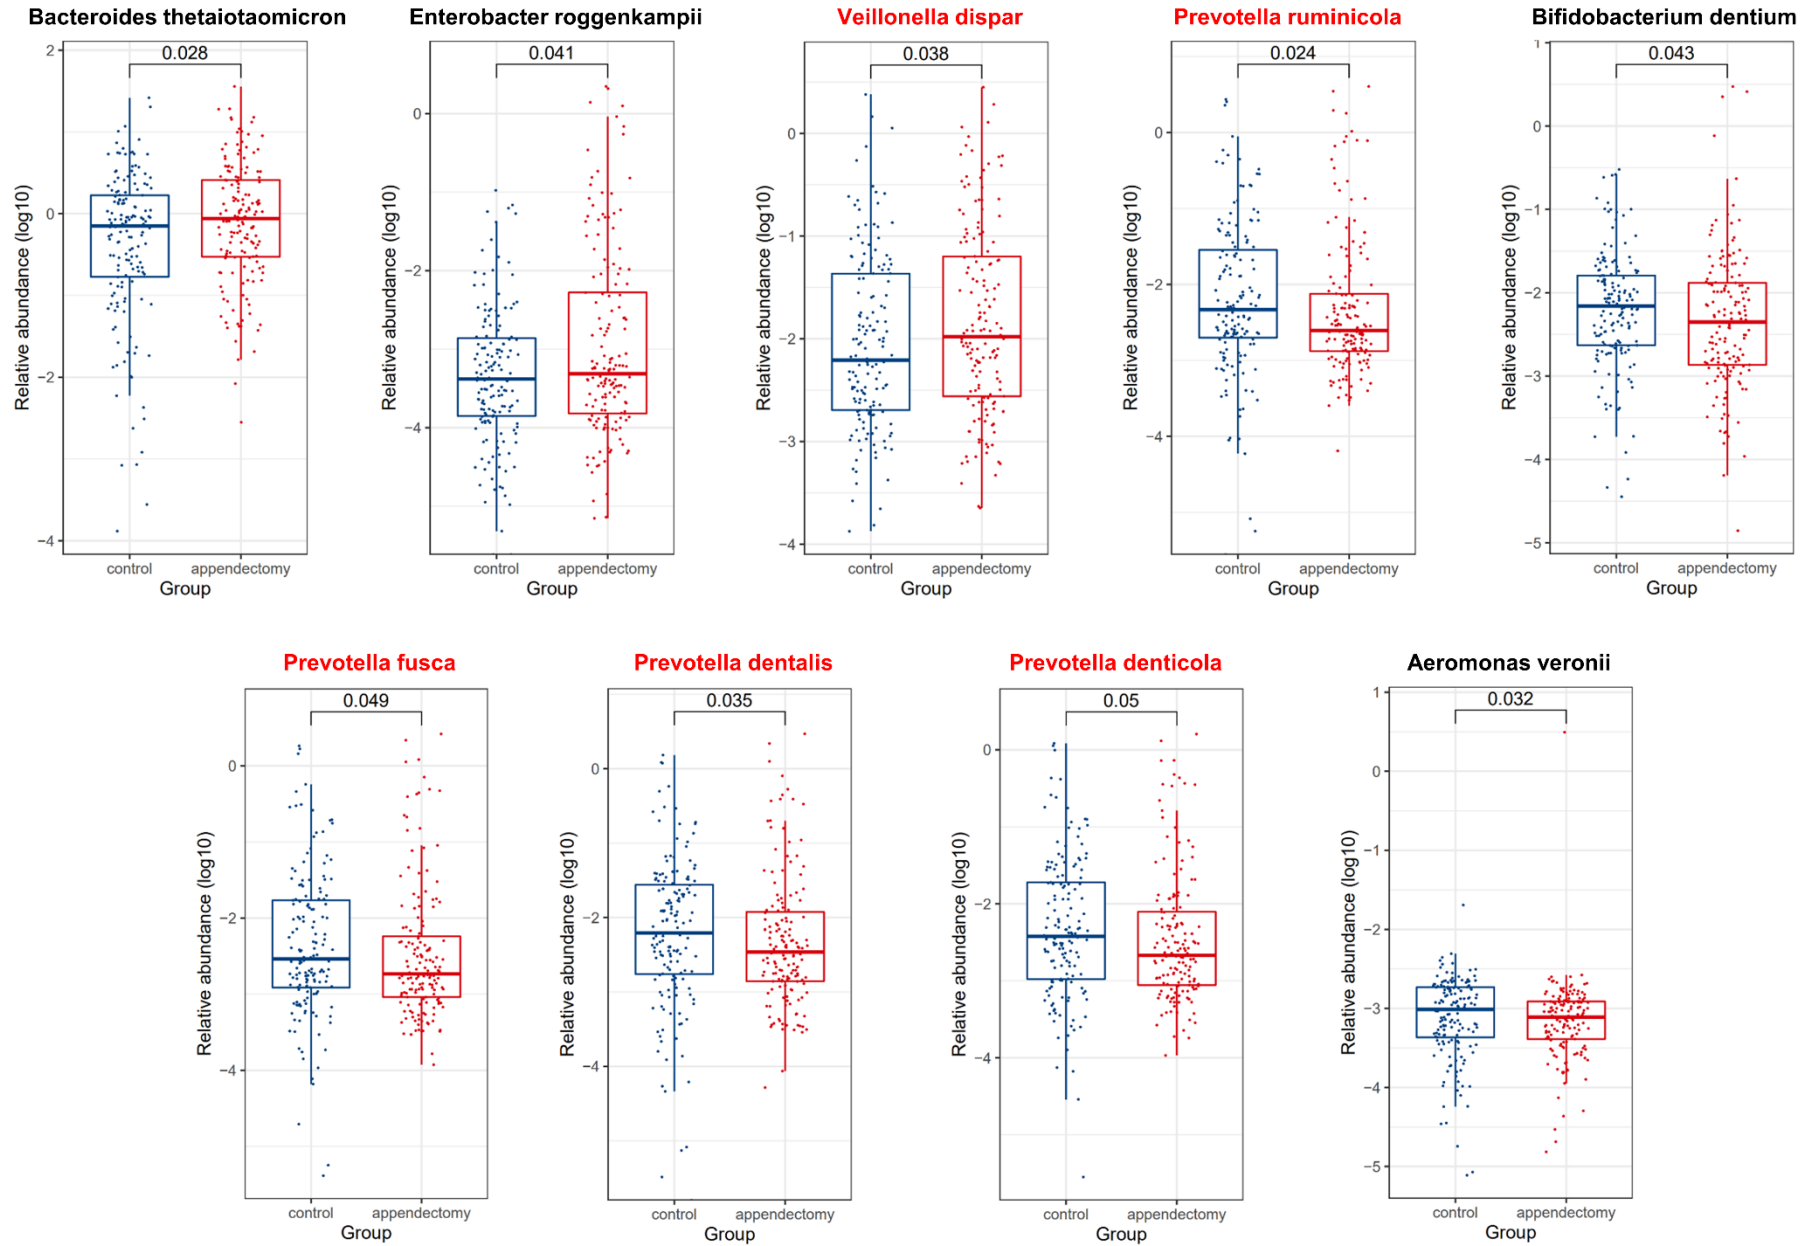

Supplement: 41388_2022_2569_MOESM6_ESM.pdf [file 41388_2022_2569_MOESM6_ESM.pdf]
