# Supplementary material for: Altered gut microbiome composition by appendectomy contributes to colorectal cancer
Source: PubMed Central journal article supplement (PMC9918431; doi:10.1038/s41388-022-02569-3), 2022-12-20

**Supplementary Figure 7. (A)** The changes of relative abundance of selected bacteria (*B. vulgatus*, *B. fragilis*, *B. sp SC05B48* and *C. aerofaciens*) during different time span after appendectomy; **(B)** The analysis of specific bacterial genetic element associated with the development of CRC.

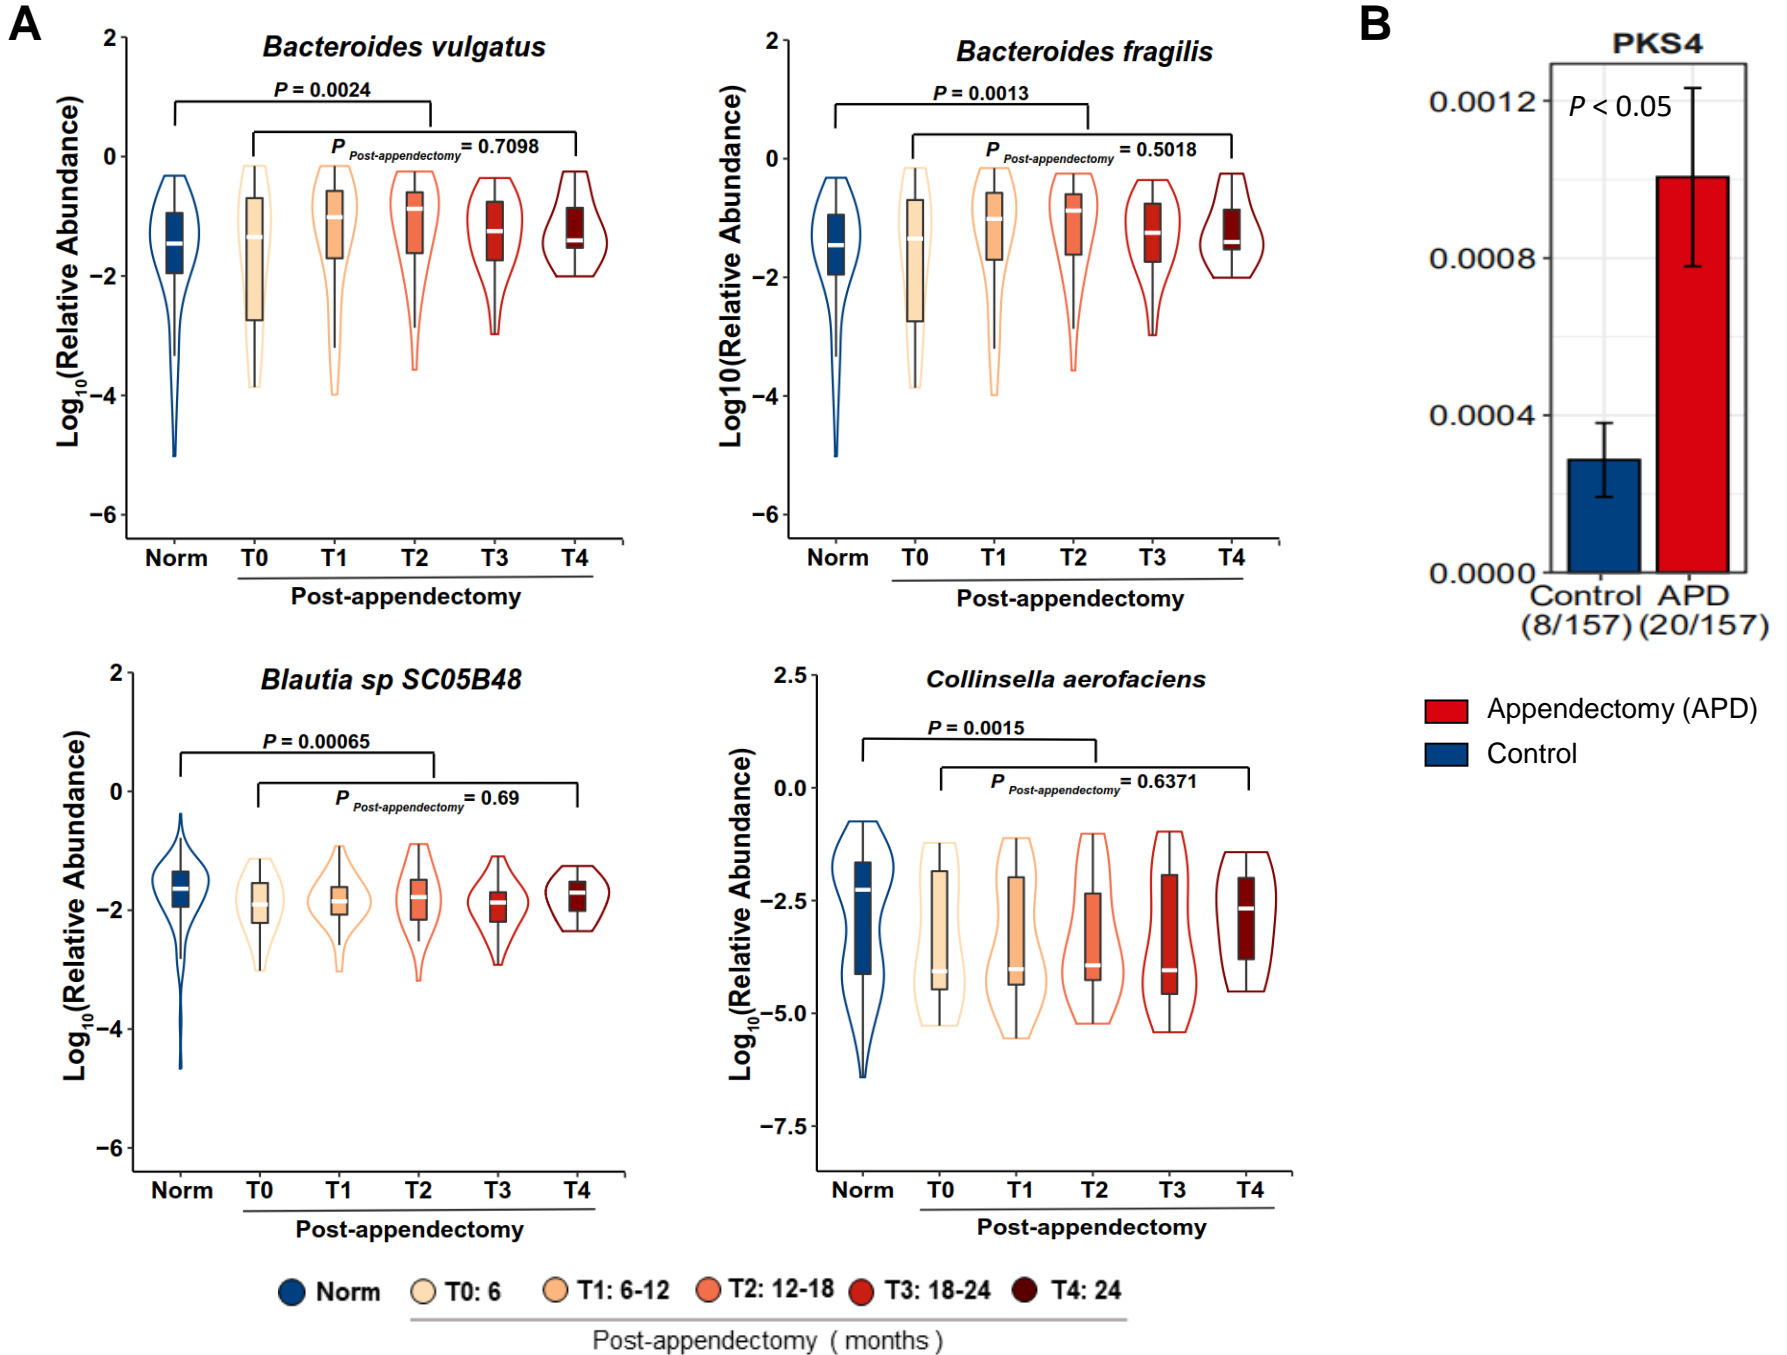

Supplement: 41388_2022_2569_MOESM8_ESM.pdf [file 41388_2022_2569_MOESM8_ESM.pdf]
