# Supplementary material for: Altered gut microbiome composition by appendectomy contributes to colorectal cancer
Source: PubMed Central journal article supplement (PMC9918431; doi:10.1038/s41388-022-02569-3), 2022-12-20

**Supplementary Figure 8.** Quantitative PCR melt curves of the microbial marker *Bacteroides fragilis* (A), *Bacteroides vulgatus* (B), *Veillonella dispar* (C), *Enterococcus hirae* (D), *Lachnospiraceae bacterium Choco86* (E), *Blautia* sp. SC05B48 (F), respectively.

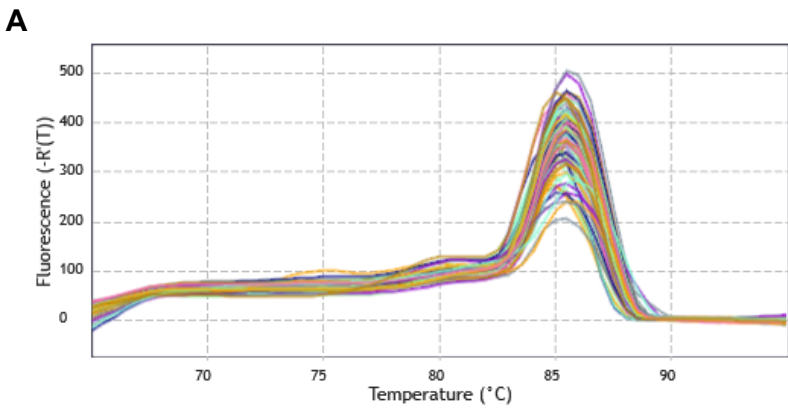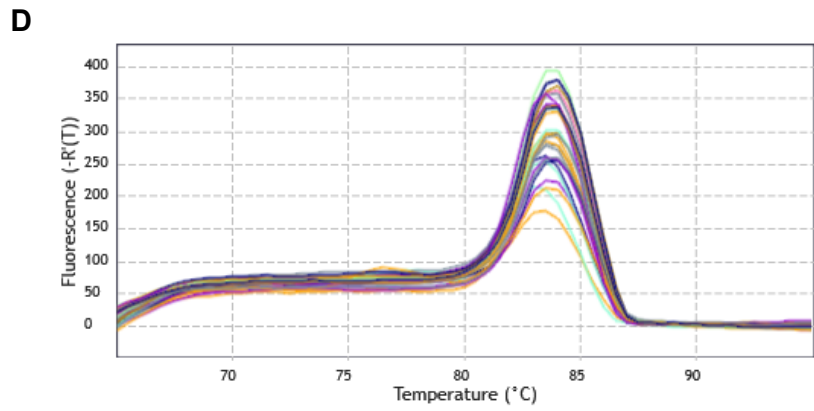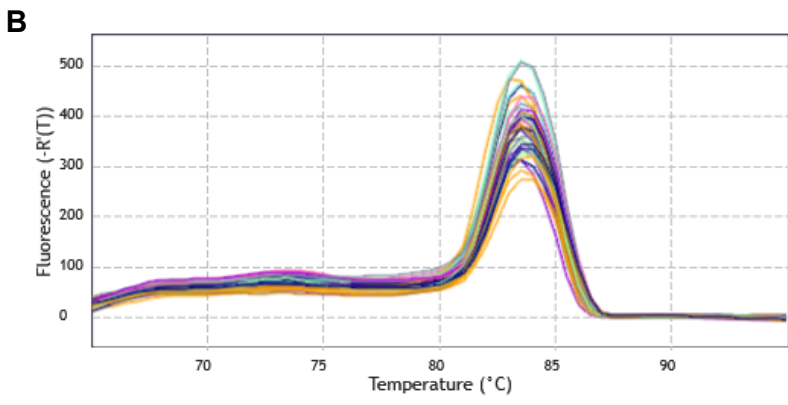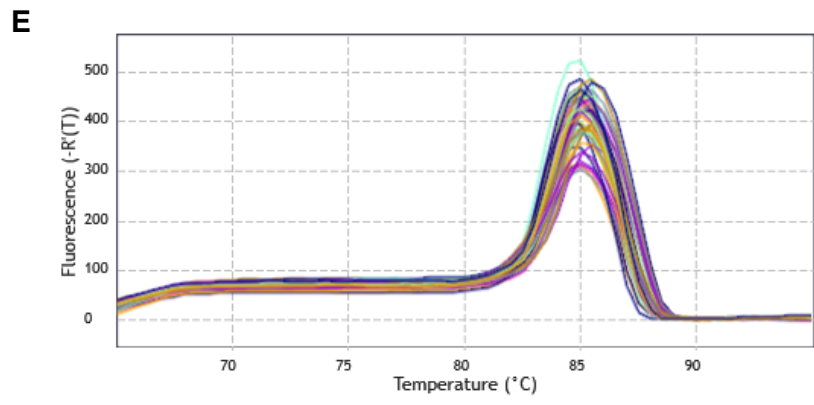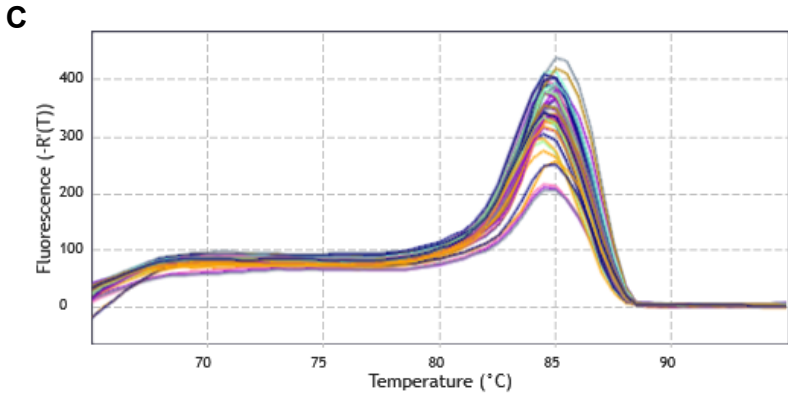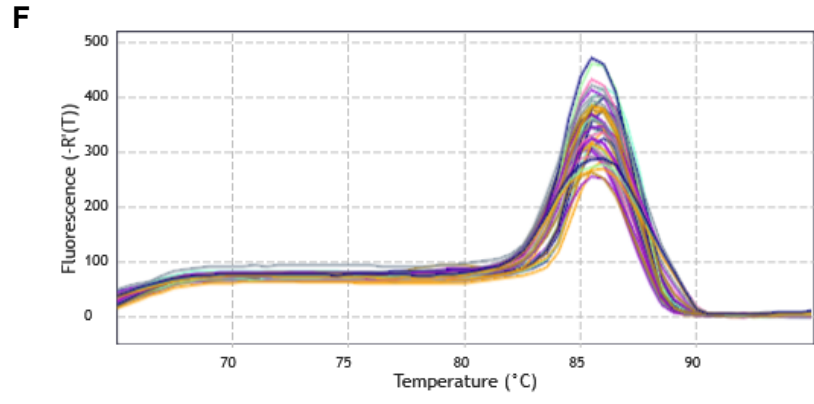

Supplement: 41388_2022_2569_MOESM9_ESM.pdf [file 41388_2022_2569_MOESM9_ESM.pdf]
