# Supplementary material for: Altered gut microbiome composition by appendectomy contributes to colorectal cancer
Source: PubMed Central journal article supplement (PMC9918431; doi:10.1038/s41388-022-02569-3), 2022-12-20

**Supplementary Figure 9 (A)** Body weight between female and male mice in appendectomy and control groups; **(B)** Differences in pathway activities scored by GSVA between appendectomy and control groups in mice by RNA sequencing.

**A**

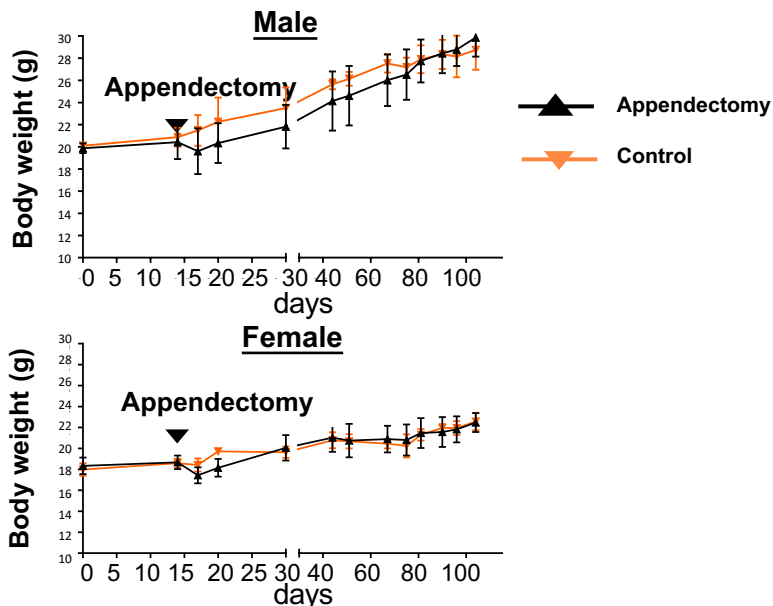

**B**

### Appendectomy vs Control

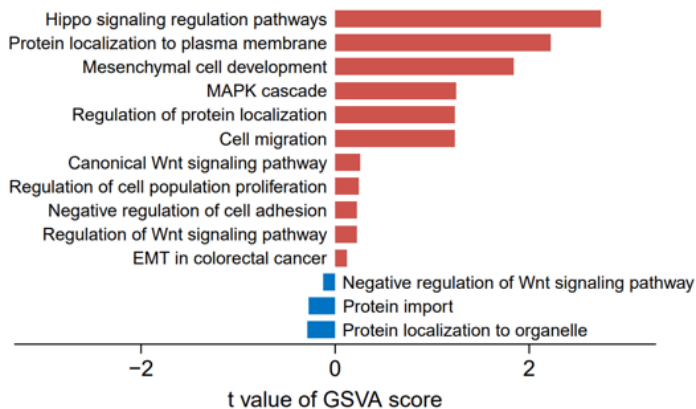

Supplement: 41388_2022_2569_MOESM10_ESM.pdf [file 41388_2022_2569_MOESM10_ESM.pdf]
