# Supplementary material for: Altered gut microbiome composition by appendectomy contributes to colorectal cancer
Source: PubMed Central journal article supplement (PMC9918431; doi:10.1038/s41388-022-02569-3), 2022-12-20

**Supplementary Figure 10. The intestinal bacteria dysbiosis caused by appendectomy play a key role in CRC tumorigenesis. (A)** Schematic diagram of a cocktail of broad-spectrum antibiotics treated AOM/DSS-induced CRC mouse model. **(B)** The level of total bacteria in stool samples of mice was determined by qPCR. **(C)** Body weight in male and female mice treated with appendectomy or control; **(D)** Representative images of colon and evaluation of colon tumor load from control and appendectomy groups in male and female mice.

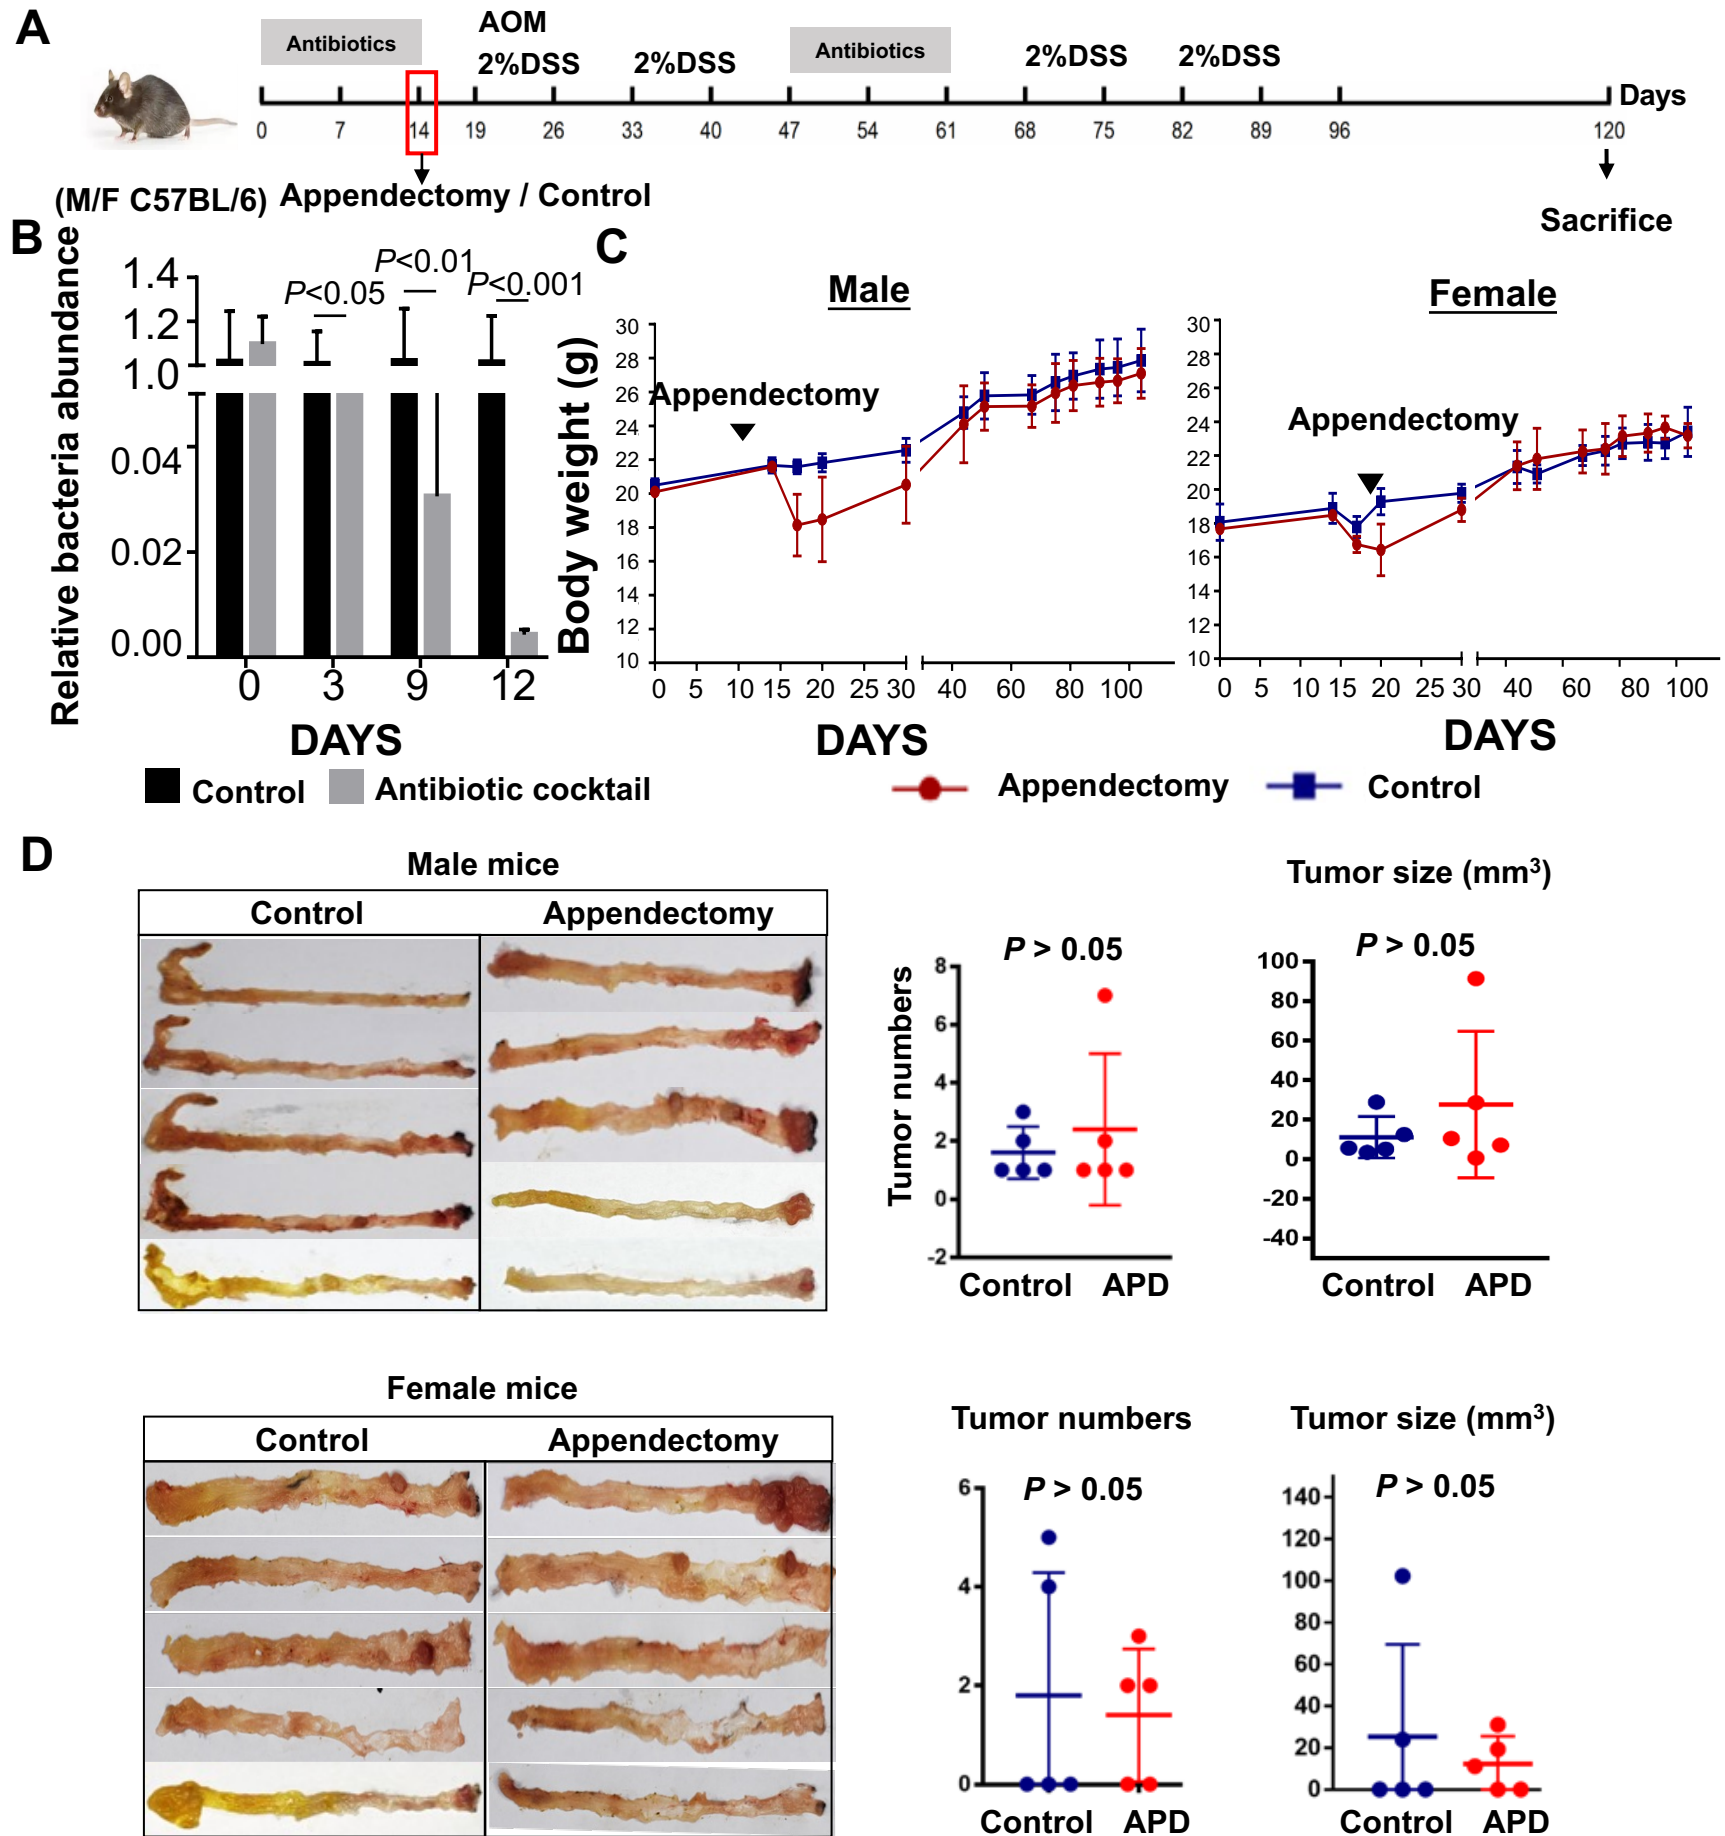

Supplement: 41388_2022_2569_MOESM11_ESM.pdf [file 41388_2022_2569_MOESM11_ESM.pdf]
