# Supplementary material for: Altered gut microbiome composition by appendectomy contributes to colorectal cancer
Source: PubMed Central journal article supplement (PMC9918431; doi:10.1038/s41388-022-02569-3), 2022-12-20
Supplement: 41388_2022_2569_MOESM12_ESM.pdf [file 41388_2022_2569_MOESM12_ESM.pdf]

**Supplementary Table 1: Baseline features of study data set before and after PS matching with and without trimming.**

|                               | All<br>(n=336,506) | Before PS matching         |                        |       | After PS matching with<br>trimming** |                       |        | After PS matching without<br>trimming** |                       |        |
|-------------------------------|--------------------|----------------------------|------------------------|-------|--------------------------------------|-----------------------|--------|-----------------------------------------|-----------------------|--------|
|                               |                    | Appendectomy<br>(n=47,860) | Control<br>(n=288,645) | ASD*  | Appendectomy<br>(n=43,976)           | Control<br>(n=85,179) | ASD*   | Appendectomy<br>(n=47,860)              | Control<br>(n=89,766) | ASD*   |
| Age, years, median (IQR)      | 57 (38-75)         | 42 (29-56)                 | 61 (40-76)             | 0.746 | 44 (32-58)                           | 44 (33-58)            | 0.032  | 42 (29-56)                              | 43(31-57)             | 0.072  |
| Male sex, No. (%)             | 151,832<br>(45.12) | 23,913 (49.96)             | 127,919<br>(44.32)     | 0.113 | 20,042 (45.57)                       | 37,346<br>(43.84)     | 0.035  | 23,913 (49.96)                          | 41,887<br>(46.66)     | 0.066  |
| DM, No. (%)                   | 36,714 (10.91)     | 1,283 (2.68)               | 35,431 (12.27)         | 0.371 | 1,271 (2.89)                         | 2,541 (2.98)          | 0.006  | 1,283 (2.68)                            | 2,552 (2.84)          | 0.010  |
| Hypertension, No. (%)         | 38,316 (11.39)     | 1,145 (2.39)               | 37,171 (12.88)         | 0.403 | 1,130 (2.57)                         | 2,233 (2.62)          | 0.003  | 1,145 (2.39)                            | 2,264 (2.52)          | 0.008  |
| Hyperlipidemia, No. (%)       | 10,114 (3.01)      | 316 (0.66)                 | 9,798 (3.39)           | 0.195 | 310 (0.70)                           | 608 (0.71)            | 0.001  | 316 (0.66)                              | 603 (0.67)            | 0.001  |
| CHF, No. (%)                  | 16,012 (4.76)      | 233 (0.49)                 | 15,779 (5.47)          | 0.296 | 223 (0.51)                           | 424 (0.50)            | 0.001  | 233 (0.49)                              | 427 (0.48)            | 0.002  |
| RD, No. (%)                   | 1,107 (0.33)       | 50 (0.10)                  | 1,057 (0.37)           | 0.054 | 50 (0.11)                            | 94 (0.11)             | 0.001  | 50 (0.10)                               | 97 (0.11)             | 0.001  |
| Dementia, No. (%)             | 4,898 (1.46)       | 54 (0.11)                  | 4,844 (1.68)           | 0.167 | 53 (0.12)                            | 91 (0.11)             | 0.004  | 54 (0.11)                               | 97 (0.11)             | 0.001  |
| Mild liver disease, No. (%)   | 1,548 (0.46)       | 26 (0.05)                  | 1,522 (0.53)           | 0.088 | 24 (0.05)                            | 51 (0.06)             | 0.002  | 26 (0.05)                               | 51 (0.06)             | 0.001  |
| Severe liver disease, No. (%) | 947 (0.28)         | 7 (0.01)                   | 940 (0.33)             | 0.076 | 7 (0.02)                             | 19 (0.02)             | 0.005  | 7 (0.01)                                | 24 (0.03)             | 0.008  |
| MI, No. (%)                   | 6,061 (1.80)       | 97 (0.20)                  | 5,964 (2.07)           | 0.177 | 90 (0.20)                            | 178 (0.21)            | 0.001  | 97 (0.20)                               | 174 (0.19)            | 0.002  |
| Paraplegia, No. (%)           | 2,639 (0.78)       | 51 (0.11)                  | 2,588 (0.90)           | 0.112 | 48 (0.11)                            | 74 (0.09)             | 0.007  | 51 (0.11)                               | 74 (0.08)             | 0.008  |
| Peptic ulcer disease, No. (%) | 4,960 (1.47)       | 216 (0.45)                 | 4,744 (1.64)           | 0.117 | 213 (0.48)                           | 375 (0.44)            | 0.007  | 216 (0.45)                              | 357 (0.40)            | 0.008  |
| CPD, No. (%)                  | 16,222 (4.82)      | 484 (1.01)                 | 15,738 (5.45)          | 0.253 | 480 (1.09)                           | 931 (1.09)            | <0.001 | 484 (1.01)                              | 906 (1.01)            | <0.001 |
| Renal disease, No. (%)        | 12,521 (3.72)      | 181 (0.38)                 | 12,340 (4.28)          | 0.261 | 173 (0.39)                           | 301 (0.35)            | 0.007  | 181 (0.38)                              | 333 (0.37)            | 0.001  |
| Stroke, No. (%)               | 19,921 (5.92)      | 412 (0.86)                 | 19,509 (6.76)          | 0.312 | 402 (0.91)                           | 732 (0.86)            | 0.006  | 412 (0.86)                              | 782 (0.87)            | 0.001  |

Continuous variables were expressed as median (IQR).

Categorical variables were expressed as number (%).

\*Variables with an ASD >0.20 is considered to be imbalanced.

\*\*PS matching was performed after trimming of the extreme PS strata (2.5th and 97.5th percentiles). Non-appendectomy individuals were matched to appendectomy patients on PS within a calliper width of 0.02. All variables were included in the model for PS estimation.

ASD: absolute standardized difference; CHF: Congestive heart failure; CPD: Chronic pulmonary disease; DM: diabetes mellitus; MI: Myocardial infarction; PS: propensity score;

PVD: Peripheral vascular disease; RD: Rheumatologic disease.

**Supplementary Table 2. Sensitivity analysis on assessing the risk of CRC after PS matching with and without trimming.**

|                | PS adjustment with trimming |                           |              |                           |                        |          | PS adjustment without trimming |                           |              |                           |                        |          |
|----------------|-----------------------------|---------------------------|--------------|---------------------------|------------------------|----------|--------------------------------|---------------------------|--------------|---------------------------|------------------------|----------|
|                | Appendectomy                |                           | Control      |                           | Adjusted SHR*          | <i>P</i> | Appendectomy                   |                           | Control      |                           | Adjusted SHR*          | <i>P</i> |
|                | NO. of event                | Incidence rate** (95% CI) | NO. of event | Incidence rate** (95% CI) |                        |          | NO. of event                   | Incidence rate** (95% CI) | NO. of event | Incidence rate** (95% CI) |                        |          |
| CRC            | 310                         | 73.1<br>(65.0-81.2)       | 388          | 39.7<br>(35.8-43.7)       | 1.730<br>(1.490-2.010) | <0.001   | 310                            | 66.4<br>(59-73.8)         | 389          | 37.7<br>(34-41.4)         | 1.710<br>(1.480-1.990) | <0.001   |
| Age≤50         | 53                          | 18.1<br>(13.3-23.0)       | 113          | 16.3<br>(13.3-19.4)       | 1.190<br>(0.848-1.660) | 0.320    | 53                             | 15.8<br>(11.6-20.1)       | 114          | 15.3<br>(12.5-18.1)       | 1.180<br>(0.842-1.640) | 0.340    |
| Age>50         | 257                         | 194.9<br>(171.1-218.7)    | 275          | 96.3<br>(84.9-107.7)      | 2.020<br>(1.710-2.396) | <0.001   | 257                            | 194.8<br>(171.0-218.6)    | 275          | 96.3<br>(84.9-107.7)      | 2.023<br>(1.710-2.395) | <0.001   |
| Female         | 135                         | 57.6<br>(47.9-67.4)       | 171          | 29.4<br>(25.0-33.8)       | 1.730<br>(1.380-2.170) | <0.001   | 135                            | 57.6<br>(47.9-67.3)       | 171          | 29.4<br>(25-33.8)         | 1.710<br>(1.360-2.170) | <0.001   |
| Male           | 175                         | 92.1<br>(78.5-105.8)      | 217          | 54.8<br>(47.5-62.1)       | 1.750<br>(1.440-2.130) | <0.001   | 175                            | 75.3<br>(64.1-86.4)       | 218          | 48.4<br>(42-54.8)         | 1.750<br>(1.450-2.130) | <0.001   |
| Proximal colon | 85                          | 20.1<br>(15.8-24.4)       | 83           | 8.5<br>(6.7-10.4)         | 2.210<br>(1.640-2.990) | <0.001   | 85                             | 18.3<br>(14.4-22.2)       | 84           | 8.2<br>(6.4-9.9)          | 2.160<br>(1.600-2.920) | <0.001   |
| Distal colon   | 101                         | 23.9<br>(19.2-28.6)       | 136          | 14<br>(11.6-16.3)         | 1.670<br>(1.290-2.150) | <0.001   | 101                            | 21.7<br>(17.5-25.9)       | 136          | 13.2<br>(11-15.4)         | 1.650<br>(1.290-2.130) | <0.001   |
| Rectum         | 101                         | 23.9<br>(19.2-28.5)       | 138          | 14.2<br>(11.8-16.5)       | 1.570<br>(1.210-2.020) | <0.001   | 101                            | 21.7<br>(17.5-25.9)       | 138          | 13.4<br>(11.2-15.6)       | 1.550<br>(1.200-2.000) | 0.001    |
| Unspecific     | 23                          | 5.4<br>(3.2-7.7)          | 31           | 3.2<br>(2.1-4.3)          | 1.560<br>(0.914-2.650) | 0.100    | 23                             | 4.9<br>(2.9-7.0)          | 31           | 3.0<br>(2.0-4.1)          | 1.560<br>(0.915-2.650) | 0.098    |

\*Adjusted by Age, Gender, Diabetes mellitus, Hypertension, Hyperlipidemia, diabetes mellitus, hypertension, hyperlipidemia, congestive heart failure, rheumatic disease, dementia, liver disease (divided into mild, moderate, or severe liver disease according to the severity of portal hypertension), myocardial infarction, paraplegia, peptic ulcer, chronic pulmonary disease, chronic kidney disease, and stroke.

\*\*Per 10000 person-years.

CRC: colorectal cancer; CI: confidence interval; PS: propensity score; SHR: subdistribution hazard ratio.

**Supplementary Table 3. Demographic and clinical characteristics of all included samples in metagenomics sequencing study**

|                                        | <b>Appendectomy<br/>(n=157)</b> | <b>Controls<br/>(n=157)</b> | <b><i>p</i></b> |
|----------------------------------------|---------------------------------|-----------------------------|-----------------|
| <b>Age, year</b>                       |                                 |                             | 0.309           |
| ≤50                                    | 85 (54.14%)                     | 76 (48.41%)                 |                 |
| >50                                    | 72 (45.86%)                     | 81 (51.59%)                 |                 |
| <b>Sex, n</b>                          |                                 |                             | 0.176           |
| Female                                 | 72 (45.86%)                     | 84 (53.50%)                 |                 |
| Male                                   | 85 (54.14%)                     | 73 (46.50%)                 |                 |
| <b>BMI, kg/m<sup>2</sup></b>           | 23.10 ± 2.63                    | 22.72 ± 2.73                | 0.214           |
| <b>Smoke status, n (%)</b>             |                                 |                             | 0.324           |
| No                                     | 122 (77.71%)                    | 129 (82.17%)                |                 |
| Current                                | 35 (22.29%)                     | 28 (17.83%)                 |                 |
| <b>Alcohol status, n (%)</b>           |                                 |                             | 0.682           |
| No                                     | 143 (91.08%)                    | 145 (92.36%)                |                 |
| Yes                                    | 14 (8.92%)                      | 12 (7.64%)                  |                 |
| <b>Diabetes mellitus, n (%)</b>        |                                 |                             | 0.791           |
| No                                     | 149 (94.90%)                    | 150 (95.54%)                |                 |
| Yes                                    | 8 (5.10%)                       | 7 (4.46%)                   |                 |
| <b>Family history of cancer, n (%)</b> |                                 |                             | 0.355           |
| No                                     | 151 (96.2%)                     | 147 (93.6%)                 |                 |
| Other cancer                           | 5 (3.2%)                        | 6 (3.8%)                    |                 |
| Colorectal cancer                      | 1 (0.6%)                        | 4 (2.5%)                    |                 |
| <b>History of appendicitis*, n (%)</b> |                                 |                             | 0.104           |
| No                                     | 146 (93.0%)                     | 151 (96.2%)                 |                 |
| Yes                                    | 3 (1.9%)                        | 0 (0.0%)                    |                 |
| Suspected                              | 8 (5.1%)                        | 6 (3.8%)                    |                 |

\*History of appendicitis was defined as any imaging evidence of chronic appendicitis before appendectomy (for appendectomy group) or fecal collection (for controls).

**Supplementary Table 4. Sequencing reads by shotgun metagenomics sequencing**

| Sample | raw pair1 | raw pair2 | trimmed pair1 | trimmed pair2 | trimmed orphan1 | trimmed orphan2 | decontaminated Homo_sapiens pair1 | decontaminated Homo_sapiens pair2 | decontaminated Homo_sapiens orphan1 | decontaminated Homo_sapiens orphan2 | final pair1 | final pair2 | final orphan1 | final orphan2 |
|--------|-----------|-----------|---------------|---------------|-----------------|-----------------|-----------------------------------|-----------------------------------|-------------------------------------|-------------------------------------|-------------|-------------|---------------|---------------|
| A100   | 56093741  | 56093741  | 40459197      | 40459197      | 6928745         | 3917448         | 40438683                          | 40438683                          | 6924952                             | 3915305                             | 40438683    | 40438683    | 6924952       | 3915305       |
| A101   | 51301931  | 51301931  | 29843134      | 29843134      | 11089271        | 3352163         | 29840876                          | 29840876                          | 11088285                            | 3351868                             | 29840876    | 29840876    | 11088285      | 3351868       |
| A102   | 52128697  | 52128697  | 33486951      | 33486951      | 8957180         | 3532548         | 33486467                          | 33486467                          | 8957023                             | 3532523                             | 33486467    | 33486467    | 8957023       | 3532523       |
| A103   | 52358420  | 52358420  | 30258798      | 30258798      | 11882952        | 3209754         | 30257673                          | 30257673                          | 11882471                            | 3209608                             | 30257673    | 30257673    | 11882471      | 3209608       |
| A104   | 50333619  | 50333619  | 32515656      | 32515656      | 8669926         | 3423529         | 32515346                          | 32515346                          | 8669839                             | 3423484                             | 32515346    | 32515346    | 8669839       | 3423484       |
| A010   | 53222675  | 53222675  | 33149529      | 33149529      | 9419192         | 3667263         | 33147301                          | 33147301                          | 9418549                             | 3667036                             | 33147301    | 33147301    | 9418549       | 3667036       |
| A011   | 52885727  | 52885727  | 29854950      | 29854950      | 11544728        | 3492122         | 29852104                          | 29852104                          | 11543725                            | 3491903                             | 29852104    | 29852104    | 11543725      | 3491903       |
| A012   | 50555180  | 50555180  | 34274062      | 34274062      | 6698238         | 3612575         | 34268701                          | 34268701                          | 6697222                             | 3611940                             | 34268701    | 34268701    | 6697222       | 3611940       |
| A013   | 54973750  | 54973750  | 36009152      | 36009152      | 9561532         | 3369053         | 35986659                          | 35986659                          | 9554585                             | 3366419                             | 35986659    | 35986659    | 9554585       | 3366419       |
| A014   | 58651958  | 58651958  | 39025308      | 39025308      | 9202455         | 3958655         | 39022942                          | 39022942                          | 9201515                             | 3958122                             | 39022942    | 39022942    | 9201515       | 3958122       |
| A015   | 56157112  | 56157112  | 36977017      | 36977017      | 9374243         | 3574356         | 36976689                          | 36976689                          | 9374143                             | 3574329                             | 36976689    | 36976689    | 9374143       | 3574329       |
| A016   | 57054180  | 57054180  | 35975783      | 35975783      | 11139636        | 3226624         | 35975437                          | 35975437                          | 11139502                            | 3226595                             | 35975437    | 35975437    | 11139502      | 3226595       |
| A017   | 52018393  | 52018393  | 37631332      | 37631332      | 6279657         | 3825124         | 37630699                          | 37630699                          | 6279606                             | 3825084                             | 37630699    | 37630699    | 6279606       | 3825084       |
| A018   | 54573835  | 54573835  | 37891412      | 37891412      | 7345876         | 3812579         | 37868448                          | 37868448                          | 7341665                             | 3810306                             | 37868448    | 37868448    | 7341665       | 3810306       |
| A019   | 55969648  | 55969648  | 39449487      | 39449487      | 7685776         | 3925853         | 39446734                          | 39446734                          | 7685208                             | 3925561                             | 39446734    | 39446734    | 7685208       | 3925561       |
| A001   | 56289099  | 56289099  | 39026954      | 39026954      | 7590085         | 3938225         | 39025965                          | 39025965                          | 7590092                             | 3938331                             | 39025965    | 39025965    | 7590092       | 3938331       |
| A020   | 56643542  | 56643542  | 38174927      | 38174927      | 8400131         | 3880720         | 38163529                          | 38163529                          | 8397491                             | 3879535                             | 38163529    | 38163529    | 8397491       | 3879535       |
| A021   | 53932584  | 53932584  | 36608567      | 36608567      | 7991014         | 3572996         | 36603843                          | 36603843                          | 7981648                             | 3563495                             | 36603843    | 36603843    | 7981648       | 3563495       |
| A022   | 55442592  | 55442592  | 36443041      | 36443041      | 9497634         | 3506993         | 36431346                          | 36431346                          | 9500080                             | 3510274                             | 36431346    | 36431346    | 9500080       | 3510274       |
| A023   | 55522835  | 55522835  | 34193948      | 34193948      | 10454096        | 3869563         | 34184855                          | 34184855                          | 10451145                            | 3868447                             | 34184855    | 34184855    | 10451145      | 3868447       |
| A024   | 55715787  | 55715787  | 37396723      | 37396723      | 7513038         | 4228427         | 37395896                          | 37395896                          | 7512837                             | 4228320                             | 37395896    | 37395896    | 7512837       | 4228320       |
| A025   | 52815099  | 52815099  | 34552264      | 34552264      | 7603733         | 4173724         | 34551880                          | 34551880                          | 7603661                             | 4173682                             | 34551880    | 34551880    | 7603661       | 4173682       |
| A026   | 55078485  | 55078485  | 30675602      | 30675602      | 13215094        | 3799846         | 30623804                          | 30623804                          | 13188502                            | 3792093                             | 30623804    | 30623804    | 13188502      | 3792093       |
| A027   | 53073596  | 53073596  | 33434649      | 33434649      | 8916406         | 3938107         | 33324783                          | 33324783                          | 8883645                             | 3925139                             | 33324783    | 33324783    | 8883645       | 3925139       |
| A028   | 51554522  | 51554522  | 32697222      | 32697222      | 8966221         | 3482895         | 32691176                          | 32691176                          | 8964602                             | 3482189                             | 32691176    | 32691176    | 8964602       | 3482189       |
| A029   | 50347432  | 50347432  | 32144140      | 32144140      | 8115124         | 3801909         | 22704978                          | 22704978                          | 5344846                             | 2539757                             | 22704978    | 22704978    | 5344846       | 2539757       |
| A002   | 57191890  | 57191890  | 38818791      | 38818791      | 9097736         | 3424852         | 38812572                          | 38812572                          | 9095327                             | 3423587                             | 38812572    | 38812572    | 9095327       | 3423587       |
| A030   | 55777549  | 55777549  | 36512408      | 36512408      | 8462753         | 3969597         | 36325977                          | 36325977                          | 8407202                             | 3943437                             | 36325977    | 36325977    | 8407202       | 3943437       |
| A031   | 52357950  | 52357950  | 34318819      | 34318819      | 8223108         | 3959720         | 34237466                          | 34237466                          | 8198198                             | 3947863                             | 34237466    | 34237466    | 8198198       | 3947863       |
| A032   | 50932351  | 50932351  | 32016417      | 32016417      | 8653209         | 3776394         | 32013456                          | 32013456                          | 8652385                             | 3776038                             | 32013456    | 32013456    | 8652385       | 3776038       |
| A033   | 52572391  | 52572391  | 33763997      | 33763997      | 7264942         | 4784061         | 33763006                          | 33763006                          | 7264658                             | 4783848                             | 33763006    | 33763006    | 7264658       | 4783848       |
| A034   | 51593319  | 51593319  | 29592389      | 29592389      | 11478432        | 3221112         | 29572042                          | 29572042                          | 11469838                            | 3218787                             | 29572042    | 29572042    | 11469838      | 3218787       |
| A036   | 57421432  | 57421432  | 39460373      | 39460373      | 7798606         | 4235956         | 39458341                          | 39458341                          | 7798069                             | 4235673                             | 39458341    | 39458341    | 7798069       | 4235673       |
| A037   | 54728394  | 54728394  | 37130674      | 37130674      | 8158922         | 3569565         | 36224225                          | 36224225                          | 7955087                             | 3476201                             | 36224225    | 36224225    | 7955087       | 3476201       |
| A038   | 54084864  | 54084864  | 37389726      | 37389726      | 7532072         | 3710179         | 37230280                          | 37230280                          | 7495828                             | 3693101                             | 37230280    | 37230280    | 7495828       | 3693101       |
| A039   | 55213712  | 55213712  | 31954198      | 31954198      | 11374367        | 3945635         | 31952628                          | 31952628                          | 11373804                            | 3945449                             | 31952628    | 31952628    | 11373804      | 3945449       |
| A003   | 56354851  | 56354851  | 36598177      | 36598177      | 10098745        | 3307569         | 36553450                          | 36553450                          | 10087311                            | 3303742                             | 36553450    | 36553450    | 10087311      | 3303742       |
| A040   | 53935314  | 53935314  | 34864091      | 34864091      | 8389579         | 4058382         | 34810992                          | 34810992                          | 8375405                             | 4051178                             | 34810992    | 34810992    | 8375405       | 4051178       |
| A041   | 54999541  | 54999541  | 34457399      | 34457399      | 9621109         | 4021951         | 34456474                          | 34456474                          | 9620810                             | 4021801                             | 34456474    | 34456474    | 9620810       | 4021801       |
| A042   | 56443328  | 56443328  | 35479192      | 35479192      | 9892181         | 3863456         | 35478475                          | 35478475                          | 9891967                             | 3863367                             | 35478475    | 35478475    | 9891967       | 3863367       |
| A043   | 50981231  | 50981231  | 32588068      | 32588068      | 8037428         | 3919973         | 32568332                          | 32568332                          | 8033053                             | 3917775                             | 32568332    | 32568332    | 8033053       | 3917775       |
| A044   | 53366817  | 53366817  | 34503119      | 34503119      | 9218563         | 3764853         | 34502491                          | 34502491                          | 9218395                             | 3764818                             | 34502491    | 34502491    | 9218395       | 3764818       |
| A045   | 51402047  | 51402047  | 31182146      | 31182146      | 9662858         | 3698365         | 31171772                          | 31171772                          | 9659647                             | 3697218                             | 31171772    | 31171772    | 9659647       | 3697218       |
| A046   | 53570327  | 53570327  | 33946945      | 33946945      | 9896146         | 3432287         | 33943408                          | 33943408                          | 9894878                             | 3431911                             | 33943408    | 33943408    | 9894878       | 3431911       |
| A047   | 50021731  | 50021731  | 33540952      | 33540952      | 7567051         | 3413470         | 33540515                          | 33540515                          | 7566968                             | 3413446                             | 33540515    | 33540515    | 7566968       | 3413446       |
| A048   | 53249928  | 53249928  | 34409674      | 34409674      | 9220113         | 3457495         | 34408445                          | 34408445                          | 9219782                             | 3457422                             | 34408445    | 34408445    | 9219782       | 3457422       |

|      |          |          |          |          |          |         |          |          |          |         |          |          |          |         |
|------|----------|----------|----------|----------|----------|---------|----------|----------|----------|---------|----------|----------|----------|---------|
| A049 | 50671465 | 50671465 | 32704438 | 32704438 | 7704793  | 4220931 | 32702362 | 32702362 | 7704429  | 4220711 | 32702362 | 32702362 | 7704429  | 4220711 |
| A004 | 56249470 | 56249470 | 36781948 | 36781948 | 9538713  | 3579145 | 36778220 | 36778220 | 9537836  | 3578831 | 36778220 | 36778220 | 9537836  | 3578831 |
| A050 | 51025434 | 51025434 | 29963698 | 29963698 | 11199996 | 3282623 | 29961285 | 29961285 | 11199026 | 3282278 | 29961285 | 29961285 | 11199026 | 3282278 |
| A051 | 54784853 | 54784853 | 33589288 | 33589288 | 11396403 | 3000850 | 33588995 | 33588995 | 11396290 | 3000835 | 33588995 | 33588995 | 11396290 | 3000835 |
| A052 | 54130563 | 54130563 | 34424793 | 34424793 | 10256324 | 3435172 | 34424317 | 34424317 | 10256190 | 3435114 | 34424317 | 34424317 | 10256190 | 3435114 |
| A053 | 51206549 | 51206549 | 35768609 | 35768609 | 6177136  | 4003070 | 35766408 | 35766408 | 6176718  | 4002803 | 35766408 | 35766408 | 6176718  | 4002803 |
| A054 | 54325847 | 54325847 | 35354257 | 35354257 | 8330013  | 4157215 | 35352583 | 35352583 | 8329506  | 4156980 | 35352583 | 35352583 | 8329506  | 4156980 |
| A055 | 51805222 | 51805222 | 32842563 | 32842563 | 9607214  | 3149334 | 32840431 | 32840431 | 9606641  | 3149168 | 32840431 | 32840431 | 9606641  | 3149168 |
| A056 | 58176140 | 58176140 | 38035207 | 38035207 | 9908282  | 3575169 | 38033415 | 38033415 | 9907714  | 3574898 | 38033415 | 38033415 | 9907714  | 3574898 |
| A057 | 54156772 | 54156772 | 36451991 | 36451991 | 8199781  | 3703380 | 36413264 | 36413264 | 8189969  | 3698897 | 36413264 | 36413264 | 8189969  | 3698897 |
| A058 | 54850424 | 54850424 | 37936757 | 37936757 | 7754916  | 3522421 | 37926376 | 37926376 | 7752939  | 3521455 | 37926376 | 37926376 | 7752939  | 3521455 |
| A059 | 55766900 | 55766900 | 38900272 | 38900272 | 7852272  | 4170032 | 38899505 | 38899505 | 7852019  | 4169933 | 38899505 | 38899505 | 7852019  | 4169933 |
| A005 | 56921431 | 56921431 | 36156643 | 36156643 | 10373627 | 3726267 | 32102076 | 32102076 | 9105433  | 3265025 | 32102076 | 32102076 | 9105433  | 3265025 |
| A060 | 56029970 | 56029970 | 37335727 | 37335727 | 9340796  | 3327119 | 36833611 | 36833611 | 9193244  | 3275681 | 36833611 | 36833611 | 9193244  | 3275681 |
| A061 | 52702163 | 52702163 | 36628847 | 36628847 | 7309923  | 3232049 | 36587028 | 36587028 | 7300366  | 3228383 | 36587028 | 36587028 | 7300366  | 3228383 |
| A062 | 54104837 | 54104837 | 37767298 | 37767298 | 7152096  | 3746123 | 37765314 | 37765314 | 7151725  | 3745911 | 37765314 | 37765314 | 7151725  | 3745911 |
| A063 | 50633215 | 50633215 | 33280626 | 33280626 | 8174448  | 3446092 | 33264809 | 33264809 | 8170152  | 3444213 | 33264809 | 33264809 | 8170152  | 3444213 |
| A064 | 52348534 | 52348534 | 37359722 | 37359722 | 5885452  | 3805656 | 37354590 | 37354590 | 5884336  | 3804969 | 37354590 | 37354590 | 5884336  | 3804969 |
| A065 | 51081048 | 51081048 | 35439868 | 35439868 | 7111020  | 3083452 | 35438943 | 35438943 | 7110740  | 3083253 | 35438943 | 35438943 | 7110740  | 3083253 |
| A066 | 55896200 | 55896200 | 38413515 | 38413515 | 7946908  | 3850614 | 38236983 | 38236983 | 7904380  | 3831958 | 38236983 | 38236983 | 7904380  | 3831958 |
| A067 | 54196169 | 54196169 | 36434119 | 36434119 | 7751855  | 4270633 | 36428672 | 36428672 | 7750332  | 4269712 | 36428672 | 36428672 | 7750332  | 4269712 |
| A068 | 55594904 | 55594904 | 36587535 | 36587535 | 10347843 | 3601745 | 36562924 | 36562924 | 10341022 | 3599890 | 36562924 | 36562924 | 10341022 | 3599890 |
| A069 | 54109105 | 54109105 | 38270947 | 38270947 | 7999520  | 3687522 | 38270683 | 38270683 | 7999457  | 3687477 | 38270683 | 38270683 | 7999457  | 3687477 |
| A006 | 54751940 | 54751940 | 32502749 | 32502749 | 11190828 | 3691979 | 32501647 | 32501647 | 11190288 | 3691781 | 32501647 | 32501647 | 11190288 | 3691781 |
| A070 | 53830865 | 53830865 | 33267071 | 33267071 | 10710537 | 3395970 | 33264640 | 33264640 | 10709816 | 3395715 | 33264640 | 33264640 | 10709816 | 3395715 |
| A072 | 57575659 | 57575659 | 39618634 | 39618634 | 9025855  | 3982704 | 39611969 | 39611969 | 9024107  | 3981961 | 39611969 | 39611969 | 9024107  | 3981961 |
| A073 | 59045975 | 59045975 | 40640571 | 40640571 | 8675957  | 4153688 | 40626393 | 40626393 | 8671548  | 4150393 | 40626393 | 40626393 | 8671548  | 4150393 |
| A075 | 56121345 | 56121345 | 37140017 | 37140017 | 8845401  | 3939518 | 37112323 | 37112323 | 8835491  | 3933782 | 37112323 | 37112323 | 8835491  | 3933782 |
| A076 | 50685064 | 50685064 | 35835986 | 35835986 | 6423275  | 3451441 | 35833916 | 35833916 | 6422827  | 3451071 | 35833916 | 35833916 | 6422827  | 3451071 |
| A077 | 54336131 | 54336131 | 37659159 | 37659159 | 7597207  | 3524490 | 37117300 | 37117300 | 7489159  | 3477151 | 37117300 | 37117300 | 7489159  | 3477151 |
| A078 | 72730759 | 72730759 | 48247873 | 48247873 | 12037416 | 4209049 | 48229334 | 48229334 | 12032896 | 4207635 | 48229334 | 48229334 | 12032896 | 4207635 |
| A079 | 51576697 | 51576697 | 35992762 | 35992762 | 6864963  | 3417744 | 35988557 | 35988557 | 6863926  | 3416918 | 35988557 | 35988557 | 6863926  | 3416918 |
| A007 | 54116250 | 54116250 | 34238091 | 34238091 | 9124217  | 3749476 | 34120010 | 34120010 | 9096066  | 3737691 | 34120010 | 34120010 | 9096066  | 3737691 |
| A080 | 59617716 | 59617716 | 41159456 | 41159456 | 8474199  | 3626973 | 41157547 | 41157547 | 8473783  | 3626861 | 41157547 | 41157547 | 8473783  | 3626861 |
| A081 | 55486847 | 55486847 | 29581750 | 29581750 | 12066852 | 4198875 | 29579046 | 29579046 | 12065748 | 4198468 | 29579046 | 29579046 | 12065748 | 4198468 |
| A082 | 54814713 | 54814713 | 36051008 | 36051008 | 9689936  | 3198725 | 33944824 | 33944824 | 9155729  | 2992671 | 33944824 | 33944824 | 9155729  | 2992671 |
| A083 | 54021765 | 54021765 | 36669180 | 36669180 | 8210972  | 3252042 | 36661933 | 36661933 | 8209447  | 3251297 | 36661933 | 36661933 | 8209447  | 3251297 |
| A084 | 56373274 | 56373274 | 36990956 | 36990956 | 9488397  | 3312668 | 36989576 | 36989576 | 9488092  | 3312587 | 36989576 | 36989576 | 9488092  | 3312587 |
| A085 | 53556610 | 53556610 | 35810021 | 35810021 | 8515331  | 3392329 | 35807512 | 35807512 | 8514794  | 3392102 | 35807512 | 35807512 | 8514794  | 3392102 |
| A086 | 52334664 | 52334664 | 29415907 | 29415907 | 9405614  | 4743609 | 29197249 | 29197249 | 9324667  | 4701988 | 29197249 | 29197249 | 9324667  | 4701988 |
| A087 | 51155787 | 51155787 | 30405102 | 30405102 | 11280973 | 3082707 | 30404758 | 30404758 | 11280856 | 3082673 | 30404758 | 30404758 | 11280856 | 3082673 |
| A088 | 54093789 | 54093789 | 36959050 | 36959050 | 7621833  | 3860234 | 36956742 | 36956742 | 7621297  | 3860019 | 36956742 | 36956742 | 7621297  | 3860019 |
| A089 | 50392003 | 50392003 | 34371330 | 34371330 | 8559633  | 3287893 | 34365272 | 34365272 | 8557835  | 3287115 | 34365272 | 34365272 | 8557835  | 3287115 |
| A008 | 50869189 | 50869189 | 32635986 | 32635986 | 8366986  | 3468203 | 32635661 | 32635661 | 8366895  | 3468150 | 32635661 | 32635661 | 8366895  | 3468150 |
| A091 | 52833066 | 52833066 | 34128486 | 34128486 | 9313801  | 3354391 | 34090671 | 34090671 | 9300903  | 3350101 | 34090671 | 34090671 | 9300903  | 3350101 |
| A092 | 58107375 | 58107375 | 40088110 | 40088110 | 9445326  | 3783771 | 40087754 | 40087754 | 9445225  | 3783732 | 40087754 | 40087754 | 9445225  | 3783732 |
| A093 | 57005660 | 57005660 | 38382209 | 38382209 | 9838590  | 3529575 | 38375141 | 38375141 | 9836993  | 3529029 | 38375141 | 38375141 | 9836993  | 3529029 |
| A094 | 51175474 | 51175474 | 34711406 | 34711406 | 7224688  | 3804344 | 34699996 | 34699996 | 7221638  | 3802897 | 34699996 | 34699996 | 7221638  | 3802897 |
| A095 | 54560335 | 54560335 | 37062958 | 37062958 | 7687599  | 4045025 | 37062308 | 37062308 | 7687414  | 4044952 | 37062308 | 37062308 | 7687414  | 4044952 |
| A096 | 54150633 | 54150633 | 31081684 | 31081684 | 13927228 | 2904883 | 31080385 | 31080385 | 13925336 | 2903774 | 31080385 | 31080385 | 13925336 | 2903774 |
| A097 | 55971088 | 55971088 | 33228604 | 33228604 | 11647675 | 3431258 | 33222087 | 33222087 | 11644728 | 3430505 | 33222087 | 33222087 | 11644728 | 3430505 |

|      |          |          |          |          |          |         |          |          |          |         |          |          |          |         |
|------|----------|----------|----------|----------|----------|---------|----------|----------|----------|---------|----------|----------|----------|---------|
| A098 | 53560738 | 53560738 | 34561008 | 34561008 | 8853758  | 3535075 | 34559101 | 34559101 | 8853378  | 3535000 | 34559101 | 34559101 | 8853378  | 3535000 |
| A099 | 50387431 | 50387431 | 30154923 | 30154923 | 9132579  | 4049633 | 30154027 | 30154027 | 9132245  | 4049467 | 30154027 | 30154027 | 9132245  | 4049467 |
| A009 | 54308338 | 54308338 | 33632501 | 33632501 | 10069806 | 3593962 | 33625906 | 33625906 | 10067617 | 3593109 | 33625906 | 33625906 | 10067617 | 3593109 |
| B012 | 53073541 | 53073541 | 28580562 | 28580562 | 9791499  | 5018873 | 28547779 | 28547779 | 9796189  | 5025705 | 28547779 | 28547779 | 9796189  | 5025705 |
| B013 | 55426524 | 55426524 | 31270014 | 31270014 | 9778873  | 4818442 | 31269341 | 31269341 | 9778619  | 4818319 | 31269341 | 31269341 | 9778619  | 4818319 |
| B014 | 54773272 | 54773272 | 39267042 | 39267042 | 7213967  | 4048579 | 39265926 | 39265926 | 7213745  | 4048476 | 39265926 | 39265926 | 7213745  | 4048476 |
| B015 | 54415987 | 54415987 | 35678028 | 35678028 | 9305649  | 3306174 | 35672691 | 35672691 | 9304153  | 3305618 | 35672691 | 35672691 | 9304153  | 3305618 |
| B016 | 52067120 | 52067120 | 36314037 | 36314037 | 7075353  | 3337256 | 36189530 | 36189530 | 7051760  | 3325903 | 36189530 | 36189530 | 7051760  | 3325903 |
| B017 | 53849240 | 53849240 | 38374597 | 38374597 | 6476151  | 3791836 | 38370669 | 38370669 | 6475377  | 3791399 | 38370669 | 38370669 | 6475377  | 3791399 |
| B018 | 54208448 | 54208448 | 37553882 | 37553882 | 7418043  | 3685760 | 37550552 | 37550552 | 7417307  | 3685283 | 37550552 | 37550552 | 7417307  | 3685283 |
| B019 | 54227080 | 54227080 | 36948937 | 36948937 | 9582453  | 2973179 | 36948293 | 36948293 | 9582252  | 2973127 | 36948293 | 36948293 | 9582252  | 2973127 |
| B001 | 56551558 | 56551558 | 37617719 | 37617719 | 8271512  | 3916414 | 37542640 | 37542640 | 8249648  | 3906830 | 37542640 | 37542640 | 8249648  | 3906830 |
| B020 | 53029875 | 53029875 | 36322482 | 36322482 | 8002370  | 3261264 | 36322184 | 36322184 | 8002305  | 3261221 | 36322184 | 36322184 | 8002305  | 3261221 |
| B021 | 51222463 | 51222463 | 36952202 | 36952202 | 5951406  | 3259809 | 36537425 | 36537425 | 5872782  | 3219388 | 36537425 | 36537425 | 5872782  | 3219388 |
| B022 | 53737290 | 53737290 | 37876888 | 37876888 | 6783715  | 3635112 | 37471962 | 37471962 | 6706971  | 3596310 | 37471962 | 37471962 | 6706971  | 3596310 |
| B023 | 56093289 | 56093289 | 40006657 | 40006657 | 6639781  | 3811404 | 39996064 | 39996064 | 6638420  | 3810712 | 39996064 | 39996064 | 6638420  | 3810712 |
| B024 | 50750407 | 50750407 | 35627896 | 35627896 | 5775116  | 3994833 | 35620954 | 35620954 | 5773907  | 3993976 | 35620954 | 35620954 | 5773907  | 3993976 |
| B025 | 54619171 | 54619171 | 34471768 | 34471768 | 11881738 | 3310311 | 34470377 | 34470377 | 11881433 | 3310373 | 34470377 | 34470377 | 11881433 | 3310373 |
| B026 | 56126244 | 56126244 | 39706532 | 39706532 | 7742395  | 4159866 | 39705166 | 39705166 | 7742115  | 4159691 | 39705166 | 39705166 | 7742115  | 4159691 |
| B027 | 54786230 | 54786230 | 38240708 | 38240708 | 7987941  | 4027714 | 38234989 | 38234989 | 7986769  | 4027159 | 38234989 | 38234989 | 7986769  | 4027159 |
| B028 | 51877168 | 51877168 | 26932518 | 26932518 | 11373171 | 4106414 | 26916785 | 26916785 | 11365676 | 4103468 | 26916785 | 26916785 | 11365676 | 4103468 |
| B029 | 53890383 | 53890383 | 38249300 | 38249300 | 7311386  | 3830070 | 38238033 | 38238033 | 7309035  | 3828767 | 38238033 | 38238033 | 7309035  | 3828767 |
| B002 | 55179517 | 55179517 | 31589172 | 31589172 | 12547812 | 3347408 | 31573086 | 31573086 | 12540532 | 3345409 | 31573086 | 31573086 | 12540532 | 3345409 |
| B030 | 53570719 | 53570719 | 30612460 | 30612460 | 9469839  | 4671340 | 30606356 | 30606356 | 9467509  | 4670174 | 30606356 | 30606356 | 9467509  | 4670174 |
| B031 | 56293754 | 56293754 | 31584073 | 31584073 | 9991601  | 5016832 | 31423993 | 31423993 | 9935357  | 4986906 | 31423993 | 31423993 | 9935357  | 4986906 |
| B032 | 51898103 | 51898103 | 37295005 | 37295005 | 6821465  | 3559386 | 37293397 | 37293397 | 6821114  | 3559199 | 37293397 | 37293397 | 6821114  | 3559199 |
| B034 | 54733103 | 54733103 | 31135458 | 31135458 | 9532373  | 4987994 | 31134906 | 31134906 | 9532117  | 4987777 | 31134906 | 31134906 | 9532117  | 4987777 |
| B035 | 51414319 | 51414319 | 30812423 | 30812423 | 9915872  | 3697488 | 30811732 | 30811732 | 9915699  | 3697415 | 30811732 | 30811732 | 9915699  | 3697415 |
| B036 | 56281404 | 56281404 | 34821459 | 34821459 | 10403247 | 3701542 | 34821018 | 34821018 | 10403120 | 3701497 | 34821018 | 34821018 | 10403120 | 3701497 |
| B037 | 51101825 | 51101825 | 31032781 | 31032781 | 9598353  | 3626844 | 30905424 | 30905424 | 9560310  | 3612657 | 30905424 | 30905424 | 9560310  | 3612657 |
| B038 | 53351679 | 53351679 | 34456538 | 34456538 | 10373962 | 3462285 | 34445893 | 34445893 | 10370101 | 3461183 | 34445893 | 34445893 | 10370101 | 3461183 |
| B039 | 54596136 | 54596136 | 35394068 | 35394068 | 8601867  | 4042421 | 35318573 | 35318573 | 8585083  | 4035015 | 35318573 | 35318573 | 8585083  | 4035015 |
| B003 | 52683152 | 52683152 | 33794162 | 33794162 | 8502332  | 3760625 | 33765369 | 33765369 | 8494575  | 3757290 | 33765369 | 33765369 | 8494575  | 3757290 |
| B040 | 50270666 | 50270666 | 30444423 | 30444423 | 9706743  | 3441767 | 30442757 | 30442757 | 9706128  | 3441579 | 30442757 | 30442757 | 9706128  | 3441579 |
| B041 | 53172278 | 53172278 | 34057761 | 34057761 | 8638994  | 3872346 | 34054279 | 34054279 | 8638078  | 3872013 | 34054279 | 34054279 | 8638078  | 3872013 |
| B042 | 57305311 | 57305311 | 35329913 | 35329913 | 10389294 | 4016237 | 35328068 | 35328068 | 10388705 | 4015994 | 35328068 | 35328068 | 10388705 | 4015994 |
| B043 | 53082183 | 53082183 | 35783801 | 35783801 | 9187273  | 3393954 | 35783014 | 35783014 | 9187056  | 3393867 | 35783014 | 35783014 | 9187056  | 3393867 |
| B044 | 53963359 | 53963359 | 32160235 | 32160235 | 10762677 | 3791317 | 32155308 | 32155308 | 10760825 | 3790779 | 32155308 | 32155308 | 10760825 | 3790779 |
| B045 | 54243318 | 54243318 | 38374944 | 38374944 | 7279415  | 3926930 | 33503393 | 33503393 | 6220445  | 3345773 | 33503393 | 33503393 | 6220445  | 3345773 |
| B046 | 53600782 | 53600782 | 37549955 | 37549955 | 6527867  | 4618898 | 37544003 | 37544003 | 6525700  | 4617358 | 37544003 | 37544003 | 6525700  | 4617358 |
| B047 | 56207775 | 56207775 | 39963572 | 39963572 | 7824855  | 3814173 | 39962000 | 39962000 | 7824468  | 3813983 | 39962000 | 39962000 | 7824468  | 3813983 |
| B048 | 54388067 | 54388067 | 38646229 | 38646229 | 6881742  | 3972385 | 38643821 | 38643821 | 6881283  | 3972122 | 38643821 | 38643821 | 6881283  | 3972122 |
| B049 | 52820059 | 52820059 | 28042363 | 28042363 | 10919738 | 4231730 | 28040437 | 28040437 | 10918757 | 4231355 | 28040437 | 28040437 | 10918757 | 4231355 |
| B004 | 54177620 | 54177620 | 36837710 | 36837710 | 6851012  | 4230324 | 36822649 | 36822649 | 6848209  | 4228916 | 36822649 | 36822649 | 6848209  | 4228916 |
| B050 | 54896721 | 54896721 | 36843337 | 36843337 | 10194912 | 2821920 | 36842337 | 36842337 | 10194369 | 2821674 | 36842337 | 36842337 | 10194369 | 2821674 |
| B051 | 53020309 | 53020309 | 35074200 | 35074200 | 8217944  | 3728966 | 35060687 | 35060687 | 8214100  | 3727223 | 35060687 | 35060687 | 8214100  | 3727223 |
| B052 | 51732165 | 51732165 | 35024404 | 35024404 | 7104443  | 3973729 | 35023728 | 35023728 | 7104267  | 3973634 | 35023728 | 35023728 | 7104267  | 3973634 |
| B053 | 50547711 | 50547711 | 33745595 | 33745595 | 7547597  | 3751592 | 33745268 | 33745268 | 7547481  | 3751547 | 33745268 | 33745268 | 7547481  | 3751547 |
| B054 | 53764682 | 53764682 | 37407521 | 37407521 | 6527343  | 4281058 | 37406787 | 37406787 | 6527197  | 4280970 | 37406787 | 37406787 | 6527197  | 4280970 |
| B056 | 50555155 | 50555155 | 33292624 | 33292624 | 8073654  | 3409365 | 33292411 | 33292411 | 8073577  | 3409326 | 33292411 | 33292411 | 8073577  | 3409326 |
| B057 | 56285755 | 56285755 | 35419814 | 35419814 | 10741662 | 3281111 | 35418979 | 35418979 | 10739541 | 3279552 | 35418979 | 35418979 | 10739541 | 3279552 |

|      |          |          |          |          |          |         |          |          |          |         |          |          |          |         |
|------|----------|----------|----------|----------|----------|---------|----------|----------|----------|---------|----------|----------|----------|---------|
| B058 | 50685959 | 50685959 | 33033402 | 33033402 | 8221851  | 3665035 | 33032952 | 33032952 | 8221760  | 3665020 | 33032952 | 33032952 | 8221760  | 3665020 |
| B059 | 52215267 | 52215267 | 35272014 | 35272014 | 7103950  | 4134529 | 35266190 | 35266190 | 7099379  | 4130417 | 35266190 | 35266190 | 7099379  | 4130417 |
| B005 | 50958682 | 50958682 | 34784426 | 34784426 | 8677684  | 3296687 | 34783996 | 34783996 | 8677573  | 3296626 | 34783996 | 34783996 | 8677573  | 3296626 |
| B060 | 53628488 | 53628488 | 35403834 | 35403834 | 8430392  | 3804705 | 35403371 | 35403371 | 8430241  | 3804578 | 35403371 | 35403371 | 8430241  | 3804578 |
| B061 | 55633263 | 55633263 | 35743499 | 35743499 | 10266351 | 3261749 | 35700089 | 35700089 | 10251951 | 3256638 | 35700089 | 35700089 | 10251951 | 3256638 |
| B062 | 53107066 | 53107066 | 36184429 | 36184429 | 7509903  | 3711209 | 36184078 | 36184078 | 7509834  | 3711207 | 36184078 | 36184078 | 7509834  | 3711207 |
| B006 | 54413285 | 54413285 | 31090862 | 31090862 | 10097710 | 4559142 | 30647557 | 30647557 | 9940401  | 4483664 | 30647557 | 30647557 | 9940401  | 4483664 |
| B008 | 55871122 | 55871122 | 40122541 | 40122541 | 7044213  | 4075792 | 40118892 | 40118892 | 7044603  | 4076388 | 40118892 | 40118892 | 7044603  | 4076388 |
| B009 | 56880947 | 56880947 | 40705341 | 40705341 | 7936100  | 3824984 | 40703908 | 40703908 | 7935737  | 3824795 | 40703908 | 40703908 | 7935737  | 3824795 |
| C100 | 55663808 | 55663808 | 27267583 | 27267583 | 13522170 | 4060137 | 27260068 | 27260068 | 13517797 | 4058788 | 27260068 | 27260068 | 13517797 | 4058788 |
| C101 | 56082481 | 56082481 | 28145871 | 28145871 | 13079655 | 4343359 | 28145192 | 28145192 | 13078916 | 4342851 | 28145192 | 28145192 | 13078916 | 4342851 |
| C010 | 50495765 | 50495765 | 25479032 | 25479032 | 12056841 | 3717029 | 25463991 | 25463991 | 12050391 | 3714722 | 25463991 | 25463991 | 12050391 | 3714722 |
| C011 | 55471169 | 55471169 | 27418717 | 27418717 | 12716972 | 4174327 | 27418317 | 27418317 | 12716794 | 4174258 | 27418317 | 27418317 | 12716794 | 4174258 |
| C012 | 53197209 | 53197209 | 36484477 | 36484477 | 8531672  | 3496421 | 36420957 | 36420957 | 8511656  | 3486778 | 36420957 | 36420957 | 8511656  | 3486778 |
| C013 | 54103309 | 54103309 | 36628219 | 36628219 | 7621347  | 3912423 | 31683665 | 31683665 | 6392542  | 3294185 | 31683665 | 31683665 | 6392542  | 3294185 |
| C014 | 53274603 | 53274603 | 26136609 | 26136609 | 12739336 | 3894829 | 26136364 | 26136364 | 12739214 | 3894796 | 26136364 | 26136364 | 12739214 | 3894796 |
| C015 | 50516190 | 50516190 | 26071502 | 26071502 | 10682901 | 4105641 | 25975647 | 25975647 | 10634812 | 4086189 | 25975647 | 25975647 | 10634812 | 4086189 |
| C016 | 53571648 | 53571648 | 28259918 | 28259918 | 10649037 | 4634629 | 28227754 | 28227754 | 10634712 | 4628398 | 28227754 | 28227754 | 10634712 | 4628398 |
| C017 | 51774435 | 51774435 | 27878563 | 27878563 | 10056723 | 4530606 | 27878072 | 27878072 | 10056576 | 4530528 | 27878072 | 27878072 | 10056576 | 4530528 |
| C018 | 57723390 | 57723390 | 40219760 | 40219760 | 7115031  | 4542452 | 38284950 | 38284950 | 6738053  | 4316341 | 38284950 | 38284950 | 6738053  | 4316341 |
| C019 | 55500889 | 55500889 | 29165110 | 29165110 | 11879849 | 4663117 | 29161176 | 29161176 | 11878223 | 4662500 | 29161176 | 29161176 | 11878223 | 4662500 |
| C001 | 54746061 | 54746061 | 35102392 | 35102392 | 8612836  | 4223114 | 35014717 | 35014717 | 8591897  | 4214474 | 35014717 | 35014717 | 8591897  | 4214474 |
| C020 | 57458081 | 57458081 | 30025509 | 30025509 | 11692106 | 5096894 | 29579969 | 29579969 | 11488624 | 5009207 | 29579969 | 29579969 | 11488624 | 5009207 |
| C021 | 50994534 | 50994534 | 31358145 | 31358145 | 9207705  | 3698524 | 31356846 | 31356846 | 9207280  | 3698331 | 31356846 | 31356846 | 9207280  | 3698331 |
| C022 | 52705558 | 52705558 | 33778949 | 33778949 | 9591075  | 3279121 | 33778005 | 33778005 | 9590739  | 3279006 | 33778005 | 33778005 | 9590739  | 3279006 |
| C023 | 53943435 | 53943435 | 35129287 | 35129287 | 9006789  | 3924291 | 35102537 | 35102537 | 8999915  | 3921436 | 35102537 | 35102537 | 8999915  | 3921436 |
| C024 | 50086011 | 50086011 | 33278234 | 33278234 | 7587905  | 3669761 | 33278016 | 33278016 | 7587846  | 3669728 | 33278016 | 33278016 | 7587846  | 3669728 |
| C025 | 66665380 | 66665380 | 47711001 | 47711001 | 9204063  | 4530530 | 47708943 | 47708943 | 9203593  | 4530318 | 47708943 | 47708943 | 9203593  | 4530318 |
| C026 | 54653958 | 54653958 | 35745576 | 35745576 | 7995264  | 4223601 | 35733642 | 35733642 | 7992812  | 4222328 | 35733642 | 35733642 | 7992812  | 4222328 |
| C027 | 59492969 | 59492969 | 36294889 | 36294889 | 10913938 | 4294548 | 36293918 | 36293918 | 10913685 | 4294456 | 36293918 | 36293918 | 10913685 | 4294456 |
| C028 | 59251031 | 59251031 | 31879293 | 31879293 | 13092969 | 4318805 | 31878475 | 31878475 | 13092581 | 4318683 | 31878475 | 31878475 | 13092581 | 4318683 |
| C029 | 52211490 | 52211490 | 28525913 | 28525913 | 10041415 | 4710896 | 28522739 | 28522739 | 10040418 | 4710506 | 28522739 | 28522739 | 10040418 | 4710506 |
| C002 | 52460197 | 52460197 | 29200907 | 29200907 | 9913492  | 4432655 | 29173808 | 29173808 | 9902782  | 4427798 | 29173808 | 29173808 | 9902782  | 4427798 |
| C030 | 53234221 | 53234221 | 34119045 | 34119045 | 8598508  | 3803372 | 34072877 | 34072877 | 8586884  | 3798375 | 34072877 | 34072877 | 8586884  | 3798375 |
| C031 | 63953748 | 63953748 | 33797709 | 33797709 | 13954212 | 4941248 | 33797517 | 33797517 | 13954096 | 4941212 | 33797517 | 33797517 | 13954096 | 4941212 |
| C032 | 58600776 | 58600776 | 28406115 | 28406115 | 14784422 | 4157032 | 28405680 | 28405680 | 14784140 | 4156958 | 28405680 | 28405680 | 14784140 | 4156958 |
| C033 | 58912087 | 58912087 | 32359170 | 32359170 | 11475190 | 4932955 | 32358797 | 32358797 | 11474995 | 4932878 | 32358797 | 32358797 | 11474995 | 4932878 |
| C034 | 54305951 | 54305951 | 27440707 | 27440707 | 12120207 | 4232539 | 27440254 | 27440254 | 12119981 | 4232449 | 27440254 | 27440254 | 12119981 | 4232449 |
| C035 | 58860458 | 58860458 | 31500759 | 31500759 | 11023422 | 5502304 | 30915391 | 30915391 | 10783874 | 5381009 | 30915391 | 30915391 | 10783874 | 5381009 |
| C036 | 53705026 | 53705026 | 27727966 | 27727966 | 11160223 | 4577726 | 27722864 | 27722864 | 11157711 | 4576646 | 27722864 | 27722864 | 11157711 | 4576646 |
| C037 | 56922426 | 56922426 | 29622095 | 29622095 | 11780013 | 4892715 | 29540517 | 29540517 | 11742285 | 4876992 | 29540517 | 29540517 | 11742285 | 4876992 |
| C038 | 51955662 | 51955662 | 33861409 | 33861409 | 8443632  | 3539873 | 33859110 | 33859110 | 8442887  | 3539664 | 33859110 | 33859110 | 8442887  | 3539664 |
| C003 | 53269437 | 53269437 | 32943461 | 32943461 | 9141840  | 4168800 | 32938357 | 32938357 | 9140064  | 4168212 | 32938357 | 32938357 | 9140064  | 4168212 |
| C040 | 54545494 | 54545494 | 36473757 | 36473757 | 8089085  | 3941443 | 36471367 | 36471367 | 8085888  | 3939073 | 36471367 | 36471367 | 8085888  | 3939073 |
| C041 | 53431287 | 53431287 | 33998735 | 33998735 | 9954436  | 3154335 | 33644840 | 33644840 | 9834810  | 3115715 | 33644840 | 33644840 | 9834810  | 3115715 |
| C042 | 52592451 | 52592451 | 37198611 | 37198611 | 6784882  | 3354221 | 37196767 | 37196767 | 6784624  | 3354131 | 37196767 | 37196767 | 6784624  | 3354131 |
| C043 | 53302917 | 53302917 | 34114297 | 34114297 | 9791631  | 3130864 | 34106243 | 34106243 | 9789235  | 3129807 | 34106243 | 34106243 | 9789235  | 3129807 |
| C044 | 53060967 | 53060967 | 36936338 | 36936338 | 7079356  | 3745631 | 36926972 | 36926972 | 7077595  | 3744629 | 36926972 | 36926972 | 7077595  | 3744629 |
| C045 | 52076280 | 52076280 | 36453399 | 36453399 | 6853051  | 3572587 | 36451938 | 36451938 | 6852825  | 3572456 | 36451938 | 36451938 | 6852825  | 3572456 |
| C046 | 51854805 | 51854805 | 35909012 | 35909012 | 7307802  | 3295089 | 35900133 | 35900133 | 7305901  | 3294320 | 35900133 | 35900133 | 7305901  | 3294320 |
| C047 | 53813213 | 53813213 | 38981104 | 38981104 | 6131417  | 3427635 | 38722461 | 38722461 | 6082603  | 3400725 | 38722461 | 38722461 | 6082603  | 3400725 |

|      |          |          |          |          |          |         |          |          |          |         |          |          |          |         |
|------|----------|----------|----------|----------|----------|---------|----------|----------|----------|---------|----------|----------|----------|---------|
| C048 | 51590165 | 51590165 | 33387129 | 33387129 | 7972721  | 3562765 | 33384289 | 33384289 | 7972041  | 3562374 | 33384289 | 33384289 | 7972041  | 3562374 |
| C049 | 51287108 | 51287108 | 34536014 | 34536014 | 8005817  | 3171805 | 34414305 | 34414305 | 7975163  | 3160563 | 34414305 | 34414305 | 7975163  | 3160563 |
| C004 | 52058545 | 52058545 | 35860483 | 35860483 | 6941508  | 3611337 | 35644724 | 35644724 | 6891260  | 3586331 | 35644724 | 35644724 | 6891260  | 3586331 |
| C050 | 51483785 | 51483785 | 34058436 | 34058436 | 8442936  | 3250524 | 34052688 | 34052688 | 8439945  | 3248623 | 34052688 | 34052688 | 8439945  | 3248623 |
| C051 | 52663000 | 52663000 | 34735878 | 34735878 | 9233377  | 2954967 | 34227519 | 34227519 | 9074779  | 2904834 | 34227519 | 34227519 | 9074779  | 2904834 |
| C052 | 62108669 | 62108669 | 31463563 | 31463563 | 14871216 | 4531959 | 31462140 | 31462140 | 14870314 | 4531676 | 31462140 | 31462140 | 14870314 | 4531676 |
| C053 | 53390830 | 53390830 | 34491948 | 34491948 | 8112727  | 3763092 | 34490612 | 34490612 | 8111786  | 3762456 | 34490612 | 34490612 | 8111786  | 3762456 |
| C054 | 53119364 | 53119364 | 35903475 | 35903475 | 7665477  | 3537991 | 35903207 | 35903207 | 7665400  | 3537937 | 35903207 | 35903207 | 7665400  | 3537937 |
| C056 | 54877883 | 54877883 | 35078087 | 35078087 | 10220176 | 3273869 | 35069545 | 35069545 | 10217434 | 3272612 | 35069545 | 35069545 | 10217434 | 3272612 |
| C057 | 54204642 | 54204642 | 37682275 | 37682275 | 7730134  | 3404480 | 37682060 | 37682060 | 7730105  | 3404447 | 37682060 | 37682060 | 7730105  | 3404447 |
| C058 | 52626262 | 52626262 | 34825180 | 34825180 | 8327188  | 3707464 | 34819926 | 34819926 | 8325668  | 3706686 | 34819926 | 34819926 | 8325668  | 3706686 |
| C059 | 51567016 | 51567016 | 32455908 | 32455908 | 10369400 | 2837016 | 32453208 | 32453208 | 10369419 | 2837441 | 32453208 | 32453208 | 10369419 | 2837441 |
| C005 | 50945389 | 50945389 | 31418264 | 31418264 | 9159196  | 3738398 | 31301742 | 31301742 | 9120252  | 3722485 | 31301742 | 31301742 | 9120252  | 3722485 |
| C060 | 53781986 | 53781986 | 36466784 | 36466784 | 7932740  | 3524870 | 36392898 | 36392898 | 7918871  | 3518272 | 36392898 | 36392898 | 7918871  | 3518272 |
| C061 | 52149900 | 52149900 | 35053924 | 35053924 | 7726185  | 3827248 | 35052177 | 35052177 | 7725937  | 3827199 | 35052177 | 35052177 | 7725937  | 3827199 |
| C062 | 52202503 | 52202503 | 34074061 | 34074061 | 8793260  | 3475371 | 34069997 | 34069997 | 8792058  | 3474918 | 34069997 | 34069997 | 8792058  | 3474918 |
| C063 | 52259184 | 52259184 | 34327618 | 34327618 | 8529830  | 3480486 | 34326588 | 34326588 | 8529537  | 3480361 | 34326588 | 34326588 | 8529537  | 3480361 |
| C064 | 51771031 | 51771031 | 34138769 | 34138769 | 8229934  | 3503355 | 34135876 | 34135876 | 8229255  | 3503047 | 34135876 | 34135876 | 8229255  | 3503047 |
| C065 | 51706597 | 51706597 | 34900907 | 34900907 | 7212334  | 3832904 | 34891684 | 34891684 | 7210211  | 3831792 | 34891684 | 34891684 | 7210211  | 3831792 |
| C066 | 54178703 | 54178703 | 36131936 | 36131936 | 8214555  | 3954874 | 36131337 | 36131337 | 8214334  | 3954789 | 36131337 | 36131337 | 8214334  | 3954789 |
| C067 | 53848904 | 53848904 | 33782219 | 33782219 | 9843619  | 3874864 | 33778982 | 33778982 | 9842438  | 3874329 | 33778982 | 33778982 | 9842438  | 3874329 |
| C068 | 54036783 | 54036783 | 36386127 | 36386127 | 7480158  | 4379003 | 36385315 | 36385315 | 7479994  | 4378921 | 36385315 | 36385315 | 7479994  | 4378921 |
| C069 | 54560342 | 54560342 | 36881537 | 36881537 | 7950486  | 3916353 | 36876484 | 36876484 | 7949278  | 3915830 | 36876484 | 36876484 | 7949278  | 3915830 |
| C006 | 65460845 | 65460845 | 40962394 | 40962394 | 10867383 | 5227559 | 40937261 | 40937261 | 10860386 | 5224535 | 40937261 | 40937261 | 10860386 | 5224535 |
| C070 | 51109250 | 51109250 | 36368024 | 36368024 | 5636147  | 3976310 | 36364843 | 36364843 | 5635032  | 3975285 | 36364843 | 36364843 | 5635032  | 3975285 |
| C071 | 51835280 | 51835280 | 28120462 | 28120462 | 9485596  | 4819670 | 28120156 | 28120156 | 9485465  | 4819611 | 28120156 | 28120156 | 9485465  | 4819611 |
| C072 | 56232571 | 56232571 | 30432093 | 30432093 | 10140458 | 5216069 | 30321934 | 30321934 | 10096738 | 5193258 | 30321934 | 30321934 | 10096738 | 5193258 |
| C073 | 53221974 | 53221974 | 37863803 | 37863803 | 7408906  | 3673350 | 36667605 | 36667605 | 7110823  | 3527409 | 36667605 | 36667605 | 7110823  | 3527409 |
| C074 | 52550088 | 52550088 | 26743897 | 26743897 | 11593580 | 4173212 | 26743585 | 26743585 | 11593333 | 4173114 | 26743585 | 26743585 | 11593333 | 4173114 |
| C075 | 53395507 | 53395507 | 28960649 | 28960649 | 9543938  | 5079119 | 28960120 | 28960120 | 9543711  | 5079001 | 28960120 | 28960120 | 9543711  | 5079001 |
| C076 | 53773642 | 53773642 | 28287271 | 28287271 | 11041207 | 4445711 | 28264320 | 28264320 | 11031693 | 4441523 | 28264320 | 28264320 | 11031693 | 4441523 |
| C077 | 56081033 | 56081033 | 28811929 | 28811929 | 12594095 | 4006450 | 28784767 | 28784767 | 12579746 | 4001633 | 28784767 | 28784767 | 12579746 | 4001633 |
| C078 | 52599241 | 52599241 | 27054540 | 27054540 | 10968146 | 4500575 | 27052023 | 27052023 | 10967070 | 4500124 | 27052023 | 27052023 | 10967070 | 4500124 |
| C079 | 56096458 | 56096458 | 29287609 | 29287609 | 11687234 | 4721238 | 29285934 | 29285934 | 11686440 | 4720905 | 29285934 | 29285934 | 11686440 | 4720905 |
| C007 | 56929850 | 56929850 | 35684189 | 35684189 | 9896691  | 4077647 | 35547771 | 35547771 | 9861230  | 4066041 | 35547771 | 35547771 | 9861230  | 4066041 |
| C080 | 54173049 | 54173049 | 27388919 | 27388919 | 12393175 | 4084333 | 27387982 | 27387982 | 12392578 | 4084053 | 27387982 | 27387982 | 12392578 | 4084053 |
| C082 | 51318325 | 51318325 | 33980176 | 33980176 | 8026435  | 3529879 | 33979331 | 33979331 | 8026135  | 3529738 | 33979331 | 33979331 | 8026135  | 3529738 |
| C083 | 54667528 | 54667528 | 36438675 | 36438675 | 10269539 | 3317916 | 36435266 | 36435266 | 10268238 | 3317234 | 36435266 | 36435266 | 10268238 | 3317234 |
| C084 | 51513749 | 51513749 | 30030658 | 30030658 | 9075089  | 4124471 | 29881489 | 29881489 | 9018358  | 4095879 | 29881489 | 29881489 | 9018358  | 4095879 |
| C085 | 50985861 | 50985861 | 28266784 | 28266784 | 8435675  | 5332371 | 28262620 | 28262620 | 8434492  | 5331613 | 28262620 | 28262620 | 8434492  | 5331613 |
| C086 | 53169757 | 53169757 | 34407299 | 34407299 | 8515890  | 3813682 | 34405965 | 34405965 | 8515601  | 3813521 | 34405965 | 34405965 | 8515601  | 3813521 |
| C087 | 53490896 | 53490896 | 32159127 | 32159127 | 10371760 | 3619149 | 32018878 | 32018878 | 10338622 | 3607534 | 32018878 | 32018878 | 10338622 | 3607534 |
| C088 | 49509706 | 49509706 | 32078117 | 32078117 | 7586853  | 3756806 | 32076607 | 32076607 | 7586570  | 3756757 | 32076607 | 32076607 | 7586570  | 3756757 |
| C089 | 55397450 | 55397450 | 38010121 | 38010121 | 9321084  | 3145286 | 37926684 | 37926684 | 9295384  | 3136627 | 37926684 | 37926684 | 9295384  | 3136627 |
| C008 | 52140080 | 52140080 | 36025633 | 36025633 | 8304635  | 3553650 | 35869303 | 35869303 | 8260902  | 3536090 | 35869303 | 35869303 | 8260902  | 3536090 |
| C090 | 49950048 | 49950048 | 33382709 | 33382709 | 6641212  | 4068945 | 33382197 | 33382197 | 6641057  | 4068856 | 33382197 | 33382197 | 6641057  | 4068856 |
| C091 | 54454114 | 54454114 | 35761014 | 35761014 | 7725074  | 4379931 | 35755091 | 35755091 | 7723592  | 4379248 | 35755091 | 35755091 | 7723592  | 4379248 |
| C092 | 58265074 | 58265074 | 27875883 | 27875883 | 15458645 | 3925233 | 27875502 | 27875502 | 15458432 | 3925147 | 27875502 | 27875502 | 15458432 | 3925147 |
| C093 | 50241876 | 50241876 | 27592385 | 27592385 | 9736386  | 4232148 | 27530708 | 27530708 | 9713846  | 4221252 | 27530708 | 27530708 | 9713846  | 4221252 |
| C094 | 51678885 | 51678885 | 34199000 | 34199000 | 7971011  | 3613422 | 34153271 | 34153271 | 7960461  | 3608300 | 34153271 | 34153271 | 7960461  | 3608300 |
| C095 | 54685295 | 54685295 | 28267979 | 28267979 | 11573440 | 4285542 | 28254690 | 28254690 | 11563592 | 4279698 | 28254690 | 28254690 | 11563592 | 4279698 |



|      |          |          |          |          |          |         |          |          |          |         |          |          |          |         |
|------|----------|----------|----------|----------|----------|---------|----------|----------|----------|---------|----------|----------|----------|---------|
| C096 | 58705029 | 58705029 | 30268995 | 30268995 | 12577962 | 4703967 | 30265628 | 30265628 | 12576413 | 4703363 | 30265628 | 30265628 | 12576413 | 4703363 |
| C097 | 60039903 | 60039903 | 26463494 | 26463494 | 16084576 | 4149108 | 26461924 | 26461924 | 16083602 | 4148844 | 26461924 | 26461924 | 16083602 | 4148844 |
| C098 | 50886876 | 50886876 | 26932902 | 26932902 | 9845845  | 4842712 | 26925062 | 26925062 | 9842534  | 4840996 | 26925062 | 26925062 | 9842534  | 4840996 |
| C099 | 56995608 | 56995608 | 27946084 | 27946084 | 13417337 | 4355774 | 27941749 | 27941749 | 13415416 | 4355078 | 27941749 | 27941749 | 13415416 | 4355078 |
| C009 | 52178530 | 52178530 | 33251391 | 33251391 | 8130172  | 4151802 | 33190650 | 33190650 | 8112132  | 4142747 | 33190650 | 33190650 | 8112132  | 4142747 |
| D010 | 52878490 | 52878490 | 35142555 | 35142555 | 7556094  | 3811686 | 35137182 | 35137182 | 7554845  | 3811161 | 35137182 | 35137182 | 7554845  | 3811161 |
| D011 | 54603291 | 54603291 | 37361440 | 37361440 | 7842354  | 3615345 | 37359343 | 37359343 | 7841846  | 3615129 | 37359343 | 37359343 | 7841846  | 3615129 |
| D012 | 55731079 | 55731079 | 36592629 | 36592629 | 8027275  | 4311493 | 35506745 | 35506745 | 7808534  | 4196831 | 35506745 | 35506745 | 7808534  | 4196831 |
| D013 | 56615736 | 56615736 | 36112164 | 36112164 | 8240152  | 4847623 | 36110687 | 36110687 | 8239660  | 4848035 | 36110687 | 36110687 | 8239660  | 4848035 |
| D014 | 52785386 | 52785386 | 33348761 | 33348761 | 9581318  | 3299985 | 33302228 | 33302228 | 9564775  | 3294530 | 33302228 | 33302228 | 9564775  | 3294530 |
| D015 | 57054008 | 57054008 | 36693585 | 36693585 | 9134597  | 4251117 | 36645326 | 36645326 | 9123168  | 4246808 | 36645326 | 36645326 | 9123168  | 4246808 |
| D016 | 58063610 | 58063610 | 36937907 | 36937907 | 9797997  | 4029234 | 35283237 | 35283237 | 9258232  | 3835569 | 35283237 | 35283237 | 9258232  | 3835569 |
| D017 | 52333518 | 52333518 | 35764791 | 35764791 | 7402302  | 3832396 | 35761192 | 35761192 | 7401289  | 3831817 | 35761192 | 35761192 | 7401289  | 3831817 |
| D018 | 56481973 | 56481973 | 38763989 | 38763989 | 7046301  | 4246397 | 38761143 | 38761143 | 7045811  | 4246125 | 38761143 | 38761143 | 7045811  | 4246125 |
| D019 | 52321935 | 52321935 | 34907563 | 34907563 | 7551691  | 4060651 | 34906520 | 34906520 | 7551413  | 4060534 | 34906520 | 34906520 | 7551413  | 4060534 |
| D001 | 57115703 | 57115703 | 28888993 | 28888993 | 12258441 | 4892002 | 28888345 | 28888345 | 12258142 | 4891891 | 28888345 | 28888345 | 12258142 | 4891891 |
| D020 | 54425797 | 54425797 | 32870184 | 32870184 | 10613479 | 3609613 | 32868817 | 32868817 | 10612970 | 3609453 | 32868817 | 32868817 | 10612970 | 3609453 |
| D021 | 55293463 | 55293463 | 36459569 | 36459569 | 7986659  | 4086019 | 36456573 | 36456573 | 7985945  | 4085691 | 36456573 | 36456573 | 7985945  | 4085691 |
| D022 | 57487360 | 57487360 | 38408870 | 38408870 | 6981332  | 4824824 | 38406180 | 38406180 | 6980775  | 4824456 | 38406180 | 38406180 | 6980775  | 4824456 |
| D023 | 54426252 | 54426252 | 36114687 | 36114687 | 8543099  | 3549010 | 36113810 | 36113810 | 8542820  | 3548900 | 36113810 | 36113810 | 8542820  | 3548900 |
| D024 | 50181234 | 50181234 | 23902261 | 23902261 | 10867576 | 4532056 | 23895186 | 23895186 | 10862888 | 4529328 | 23895186 | 23895186 | 10862888 | 4529328 |
| D025 | 53579694 | 53579694 | 28245459 | 28245459 | 11817419 | 4318652 | 28244927 | 28244927 | 11817221 | 4318588 | 28244927 | 28244927 | 11817221 | 4318588 |
| D026 | 55669333 | 55669333 | 35081618 | 35081618 | 10140558 | 3935744 | 35079188 | 35079188 | 10139726 | 3935411 | 35079188 | 35079188 | 10139726 | 3935411 |
| D027 | 52569857 | 52569857 | 27847791 | 27847791 | 11102249 | 4065228 | 27847482 | 27847482 | 11102102 | 4065180 | 27847482 | 27847482 | 11102102 | 4065180 |
| D028 | 51631142 | 51631142 | 34119587 | 34119587 | 7944742  | 3716363 | 34119111 | 34119111 | 7944638  | 3716317 | 34119111 | 34119111 | 7944638  | 3716317 |
| D029 | 53022222 | 53022222 | 35585491 | 35585491 | 7648194  | 3890826 | 35490606 | 35490606 | 7622927  | 3878916 | 35490606 | 35490606 | 7622927  | 3878916 |
| D002 | 62672809 | 62672809 | 32924211 | 32924211 | 12842246 | 5357356 | 32922701 | 32922701 | 12841174 | 5356565 | 32922701 | 32922701 | 12841174 | 5356565 |
| D030 | 59885859 | 59885859 | 39969456 | 39969456 | 9114703  | 4529432 | 39884923 | 39884923 | 9098708  | 4522551 | 39884923 | 39884923 | 9098708  | 4522551 |
| D031 | 52214592 | 52214592 | 34225220 | 34225220 | 8271860  | 3766695 | 34221107 | 34221107 | 8270889  | 3766348 | 34221107 | 34221107 | 8270889  | 3766348 |
| D032 | 53280263 | 53280263 | 35833390 | 35833390 | 7618686  | 4065694 | 35833078 | 35833078 | 7618617  | 4065645 | 35833078 | 35833078 | 7618617  | 4065645 |
| D033 | 53810545 | 53810545 | 30061106 | 30061106 | 13733063 | 3147608 | 30057495 | 30057495 | 13731104 | 3147140 | 30057495 | 30057495 | 13731104 | 3147140 |
| D035 | 55576633 | 55576633 | 35591561 | 35591561 | 9778856  | 3702313 | 35581373 | 35581373 | 9775882  | 3701291 | 35581373 | 35581373 | 9775882  | 3701291 |
| D036 | 51439715 | 51439715 | 28703503 | 28703503 | 9586537  | 4430469 | 28701994 | 28701994 | 9585998  | 4430214 | 28701994 | 28701994 | 9585998  | 4430214 |
| D037 | 52011529 | 52011529 | 29529263 | 29529263 | 9362683  | 4489038 | 29507003 | 29507003 | 9354013  | 4484944 | 29507003 | 29507003 | 9354013  | 4484944 |
| D038 | 53340602 | 53340602 | 28818875 | 28818875 | 11033786 | 4224508 | 28369801 | 28369801 | 10829920 | 4141956 | 28369801 | 28369801 | 10829920 | 4141956 |
| D039 | 53697728 | 53697728 | 27031267 | 27031267 | 11516655 | 4544402 | 27030966 | 27030966 | 11516521 | 4544354 | 27030966 | 27030966 | 11516521 | 4544354 |
| D003 | 59183516 | 59183516 | 30535538 | 30535538 | 13519191 | 4506413 | 30534216 | 30534216 | 13518595 | 4506201 | 30534216 | 30534216 | 13518595 | 4506201 |
| D040 | 56825645 | 56825645 | 35372300 | 35372300 | 11919788 | 3275554 | 35362271 | 35362271 | 11909823 | 3267207 | 35362271 | 35362271 | 11909823 | 3267207 |
| D041 | 53149267 | 53149267 | 29720759 | 29720759 | 9726993  | 4608934 | 29719726 | 29719726 | 9726504  | 4608633 | 29719726 | 29719726 | 9726504  | 4608633 |
| D042 | 57847957 | 57847957 | 30422322 | 30422322 | 12149490 | 4556826 | 30421732 | 30421732 | 12149211 | 4556708 | 30421732 | 30421732 | 12149211 | 4556708 |
| D043 | 52810680 | 52810680 | 35867324 | 35867324 | 7604723  | 3874759 | 35860184 | 35860184 | 7602953  | 3873832 | 35860184 | 35860184 | 7602953  | 3873832 |
| D044 | 53097715 | 53097715 | 29860271 | 29860271 | 9281698  | 4545616 | 29859802 | 29859802 | 9281497  | 4545575 | 29859802 | 29859802 | 9281497  | 4545575 |
| D045 | 62587389 | 62587389 | 33116466 | 33116466 | 13134906 | 5018191 | 33106591 | 33106591 | 13129872 | 5016246 | 33106591 | 33106591 | 13129872 | 5016246 |
| D046 | 53119249 | 53119249 | 33762970 | 33762970 | 8728394  | 3546775 | 33104809 | 33104809 | 8545525  | 3478023 | 33104809 | 33104809 | 8545525  | 3478023 |
| D047 | 52867032 | 52867032 | 34055544 | 34055544 | 9183875  | 3586662 | 34047696 | 34047696 | 9181694  | 3585596 | 34047696 | 34047696 | 9181694  | 3585596 |
| D048 | 52240204 | 52240204 | 35993055 | 35993055 | 7438268  | 3232540 | 35962112 | 35962112 | 7431357  | 3229617 | 35962112 | 35962112 | 7431357  | 3229617 |
| D049 | 52136237 | 52136237 | 36635209 | 36635209 | 6948152  | 3393492 | 35647663 | 35647663 | 6725075  | 3285725 | 35647663 | 35647663 | 6725075  | 3285725 |
| D004 | 66996674 | 66996674 | 36616827 | 36616827 | 13460650 | 5273180 | 36616492 | 36616492 | 13460517 | 5273145 | 36616492 | 36616492 | 13460517 | 5273145 |
| D050 | 53995690 | 53995690 | 37699632 | 37699632 | 7376836  | 3357947 | 37533905 | 37533905 | 7342734  | 3341924 | 37533905 | 37533905 | 7342734  | 3341924 |
| D051 | 54015066 | 54015066 | 36839560 | 36839560 | 7964575  | 3539855 | 36773602 | 36773602 | 7950078  | 3533857 | 36773602 | 36773602 | 7950078  | 3533857 |
| D052 | 53539142 | 53539142 | 36263388 | 36263388 | 8206913  | 3297447 | 36261687 | 36261687 | 8206501  | 3297322 | 36261687 | 36261687 | 8206501  | 3297322 |

---

|      |          |          |          |          |          |         |          |          |          |         |          |          |          |         |
|------|----------|----------|----------|----------|----------|---------|----------|----------|----------|---------|----------|----------|----------|---------|
| D053 | 50766454 | 50766454 | 34903144 | 34903144 | 7424424  | 3094628 | 34896120 | 34896120 | 7423459  | 3094382 | 34896120 | 34896120 | 7423459  | 3094382 |
| D054 | 53706682 | 53706682 | 39028417 | 39028417 | 6018566  | 3503546 | 39027271 | 39027271 | 6018393  | 3503442 | 39027271 | 39027271 | 6018393  | 3503442 |
| D055 | 53665499 | 53665499 | 37169040 | 37169040 | 7125671  | 3809155 | 37161528 | 37161528 | 7124163  | 3808475 | 37161528 | 37161528 | 7124163  | 3808475 |
| D056 | 52304586 | 52304586 | 34425327 | 34425327 | 7933201  | 3841106 | 34421960 | 34421960 | 7932457  | 3840785 | 34421960 | 34421960 | 7932457  | 3840785 |
| D057 | 50085496 | 50085496 | 24976454 | 24976454 | 11136128 | 4172297 | 21450285 | 21450285 | 9415028  | 3477372 | 21450285 | 21450285 | 9415028  | 3477372 |
| D058 | 51223098 | 51223098 | 24591115 | 24591115 | 12843494 | 3419027 | 24519244 | 24519244 | 12799473 | 3404625 | 24519244 | 24519244 | 12799473 | 3404625 |
| D059 | 63382409 | 63382409 | 35228299 | 35228299 | 14089387 | 4938542 | 35227672 | 35227672 | 14089059 | 4938359 | 35227672 | 35227672 | 14089059 | 4938359 |
| D005 | 54343942 | 54343942 | 36491591 | 36491591 | 7248811  | 4170177 | 36258478 | 36258478 | 7209287  | 4151291 | 36258478 | 36258478 | 7209287  | 4151291 |
| D060 | 52656441 | 52656441 | 25035767 | 25035767 | 13073516 | 4073170 | 25034441 | 25034441 | 13072696 | 4072946 | 25034441 | 25034441 | 13072696 | 4072946 |
| D006 | 54755792 | 54755792 | 36421339 | 36421339 | 7855054  | 3932707 | 36373538 | 36373538 | 7843288  | 3926628 | 36373538 | 36373538 | 7843288  | 3926628 |
| D007 | 51570057 | 51570057 | 35252598 | 35252598 | 6856979  | 3896882 | 35252224 | 35252224 | 6856867  | 3896822 | 35252224 | 35252224 | 6856867  | 3896822 |
| D008 | 52543695 | 52543695 | 32108613 | 32108613 | 9902561  | 3630302 | 32025333 | 32025333 | 9875794  | 3621013 | 32025333 | 32025333 | 9875794  | 3621013 |
| D009 | 53664621 | 53664621 | 34165269 | 34165269 | 8481240  | 4177263 | 34142926 | 34142926 | 8474302  | 4174115 | 34142926 | 34142926 | 8474302  | 4174115 |

---

**Note:** Appendectomy cases: A and B; Controls: C and D.

**Supplementary Table 5. The Stronger correlations in appendectomy cases between appendectomy-enriched and depleted bacteria**

| <b>Bacteria-1</b>            | <b>Bacteria-2</b>                 | <b>Rho</b> | <b>Correlation</b> | <b>Transparency</b>           |
|------------------------------|-----------------------------------|------------|--------------------|-------------------------------|
| Enterococcus hirae           | Enterococcus faecalis             | 0.608541   | Positive           | StrongCorr--0.6 <= rho < 0.7  |
| Clostridium sp SY8519        | Enterococcus hirae                | 0.655580   | Positive           | StrongCorr--0.6 <= rho < 0.7  |
| Bacteroides vulgatus         | Aeromonas veronii                 | -0.220520  | Negative           | StrongCorr--0.3 <= rho < -0.2 |
| Bacteroides vulgatus         | Clostridium sp SY8519             | -0.289012  | Negative           | StrongCorr--0.3 <= rho < -0.2 |
| Bacteroides vulgatus         | Blautia sp YL58                   | -0.273733  | Negative           | StrongCorr--0.3 <= rho < -0.2 |
| Bacteroides vulgatus         | Enterococcus hirae                | -0.205366  | Negative           | StrongCorr--0.3 <= rho < -0.2 |
| Bacteroides vulgatus         | Faecalitalea cylindroides         | -0.278717  | Negative           | StrongCorr--0.3 <= rho < -0.2 |
| Bacteroides vulgatus         | Enterococcus faecalis             | -0.244516  | Negative           | StrongCorr--0.3 <= rho < -0.2 |
| Bacteroides vulgatus         | Anaerobutyricum hallii            | -0.268176  | Negative           | StrongCorr--0.3 <= rho < -0.2 |
| Bacteroides vulgatus         | Collinsella aerofaciens           | -0.233362  | Negative           | StrongCorr--0.3 <= rho < -0.2 |
| Bacteroides vulgatus         | Blautia sp SC05B48                | -0.317485  | Negative           | StrongCorr--0.4 <= rho < -0.3 |
| Bacteroides thetaiotaomicron | Clostridium sp SY8519             | -0.320413  | Negative           | StrongCorr--0.4 <= rho < -0.3 |
| Bacteroides thetaiotaomicron | Blautia sp YL58                   | -0.235914  | Negative           | StrongCorr--0.3 <= rho < -0.2 |
| Bacteroides thetaiotaomicron | Mordavella sp Marseille P3756     | -0.250479  | Negative           | StrongCorr--0.3 <= rho < -0.2 |
| Bacteroides thetaiotaomicron | Lachnospiraceae bacterium Choco86 | -0.432693  | Negative           | StrongCorr--rho < -0.4        |
| Bacteroides thetaiotaomicron | Anaerobutyricum hallii            | -0.312155  | Negative           | StrongCorr--0.4 <= rho < -0.3 |
| Bacteroides fragilis         | Enterobacter roggenkampii         | -0.208045  | Negative           | StrongCorr--0.3 <= rho < -0.2 |
| Bacteroides fragilis         | Aeromonas veronii                 | -0.257118  | Negative           | StrongCorr--0.3 <= rho < -0.2 |
| Bacteroides fragilis         | Clostridium sp SY8519             | -0.336107  | Negative           | StrongCorr--0.4 <= rho < -0.3 |
| Bacteroides fragilis         | Enterococcus hirae                | -0.337307  | Negative           | StrongCorr--0.4 <= rho < -0.3 |
| Bacteroides fragilis         | Enterococcus faecalis             | -0.286770  | Negative           | StrongCorr--0.3 <= rho < -0.2 |
| Bacteroides fragilis         | Collinsella aerofaciens           | -0.227237  | Negative           | StrongCorr--0.3 <= rho < -0.2 |

**Supplementary Table 6. The Stronger correlations in controls between appendectomy-enriched and depleted bacteria**

| <b>Bacteria-1</b>                 | <b>Bacteria-2</b>                      | <b>Rho</b> | <b>Correlation</b> | <b>Transparency</b>           |
|-----------------------------------|----------------------------------------|------------|--------------------|-------------------------------|
| Bacteroides fragilis              | Bacteroides thetaiotaomicron           | 0.703902   | Positive           | StrongCorr--0.7 <= rho < 0.8  |
| Bacteroides vulgatus              | Bacteroides fragilis                   | 0.648066   | Positive           | StrongCorr--0.6 <= rho < 0.7  |
| Blautia sp YL58                   | Faecalitalea cylindroides              | 0.807715   | Positive           | StrongCorr--0.8 <= rho < 0.9  |
| Blautia sp YL58                   | Mordavella sp Marseille P3756          | 0.733917   | Positive           | StrongCorr--0.7 <= rho < 0.8  |
| Faecalitalea cylindroides         | Anaerobutyricum hallii                 | 0.810986   | Positive           | StrongCorr--0.8 <= rho < 0.9  |
| Lachnospiraceae bacterium Choco86 | Anaerobutyricum hallii                 | 0.827027   | Positive           | StrongCorr--0.8 <= rho < 0.9  |
| Mordavella sp Marseille P3756     | Anaerobutyricum hallii                 | 0.696953   | Positive           | StrongCorr--0.6 <= rho < 0.7  |
| Prevotella fusca                  | Prevotella dentalis                    | 0.859938   | Positive           | StrongCorr--0.8 <= rho < 0.9  |
| Prevotella ruminicola             | Prevotella dentalis                    | 0.884479   | Positive           | StrongCorr--0.8 <= rho < 0.9  |
| Bacteroides fragilis              | Citrobacter freundii complex sp CFNIH3 | -0.209527  | Negative           | StrongCorr--0.3 <= rho < -0.2 |
| Bacteroides thetaiotaomicron      | Citrobacter freundii complex sp CFNIH3 | -0.210544  | Negative           | StrongCorr--0.3 <= rho < -0.2 |
| Enterobacter roggkampii           | Eggerthella lenta                      | -0.215948  | Negative           | StrongCorr--0.3 <= rho < -0.2 |
| Veillonella dispar                | Eggerthella lenta                      | -0.220393  | Negative           | StrongCorr--0.3 <= rho < -0.2 |

**Supplementary Table 7. The characteristics of microbiota networks among appendectomy-enriched and depleted bacteria in appendectomy cases**

| <b>Tax</b>                                | <b>Degree</b> | <b>Closeness centrality</b> | <b>Betweenness centrality</b> |
|-------------------------------------------|---------------|-----------------------------|-------------------------------|
| Bacteroides vulgatus                      | 9             | 0.088235294                 | 47.96666667                   |
| Bacteroides fragilis                      | 6             | 0.086330935                 | 18.93333333                   |
| Bacteroides<br>thetaiotaomicron           | 5             | 0.086021505                 | 27.16666667                   |
| Clostridium sp SY8519                     | 4             | 0.087591241                 | 19.33333333                   |
| Enterococcus hirae                        | 4             | 0.086956522                 | 2.8                           |
| Enterococcus faecalis                     | 3             | 0.085714286                 | 1.86666667                    |
| Blautia sp YL58                           | 2             | 0.086021505                 | 5.1                           |
| Anaerobutyricum hallii                    | 2             | 0.086021505                 | 5.1                           |
| Aeromonas veronii                         | 2             | 0.085409253                 | 1.86666667                    |
| Collinsella aerofaciens                   | 2             | 0.085409253                 | 1.86666667                    |
| Enterobacter<br>roggenkampii              | 1             | 0.082474227                 | 0                             |
| Faecalitalea cylindroides                 | 1             | 0.084210526                 | 0                             |
| Mordavella sp Marseille<br>P3756          | 1             | 0.082191781                 | 0                             |
| Lachnospiraceae<br>bacterium Choco86      | 1             | 0.082191781                 | 0                             |
| Blautia sp SC05B48                        | 1             | 0.084210526                 | 0                             |
| Veillonella dispar                        | 0             | 0.04                        | 0                             |
| Prevotella ruminicola                     | 0             | 0.04                        | 0                             |
| Bifidobacterium dentium                   | 0             | 0.04                        | 0                             |
| Prevotella fusca                          | 0             | 0.04                        | 0                             |
| Prevotella dentalis                       | 0             | 0.04                        | 0                             |
| Prevotella denticola                      | 0             | 0.04                        | 0                             |
| Citrobacter freundii<br>complex sp CFNIH3 | 0             | 0.04                        | 0                             |
| Phascolarctobacterium<br>succinatutens    | 0             | 0.04                        | 0                             |
| Phascolarctobacterium<br>faecium          | 0             | 0.04                        | 0                             |
| Eggerthella lenta                         | 0             | 0.04                        | 0                             |

**Supplementary Table 8. Significantly differentially enriched species before and after appendectomy in mice.**

| Species                                            | <i>P</i>    | Mean Abundance<br>(Before) | Mean Abundance<br>(After) | log2FoldChange<br>(After/Before) | Enrichment |
|----------------------------------------------------|-------------|----------------------------|---------------------------|----------------------------------|------------|
| <i>Erysipelotrichaceae</i><br><i>bacterium I46</i> | 0.047220904 | 1.00E-09                   | 2.60E-05                  | 14.66742331                      | After      |
| <i>Shigella sonnei</i>                             | 0.047220904 | 1.00E-09                   | 2.18E-05                  | 14.41446277                      | After      |
| <i>Salmonella sp. S13</i>                          | 0.047220904 | 1.00E-09                   | 1.37E-06                  | 10.42158237                      | After      |
| <i>Escherichia coli</i>                            | 0.020921335 | 7.23E-05                   | 0.009764572               | 7.077852345                      | After      |
| <i>Bacteroides</i><br><i>thetaiotaomicron</i>      | 0.020921335 | 0.002033512                | 0.079584124               | 5.290435264                      | After      |
| <i>Bacteroides intestinalis</i>                    | 0.020921335 | 0.000756087                | 0.011382064               | 3.912066417                      | After      |
| <i>Bacteroides cellulosilyticus</i>                | 0.020921335 | 0.000742747                | 0.011129056               | 3.905316596                      | After      |
| <i>Kosakonia arachidis</i>                         | 0.020921335 | 2.32E-06                   | 2.75E-05                  | 3.565971489                      | After      |
| <i>Bacteroides xylanisolvens</i>                   | 0.020921335 | 0.000582105                | 0.00631284                | 3.438937594                      | After      |
| <i>Bacteroides ovatus</i>                          | 0.020921335 | 0.001166717                | 0.01015338                | 3.1214333                        | After      |
| <i>Brucella ovis</i>                               | 0.013874406 | 5.58E-07                   | 1.00E-09                  | -9.124752886                     | Before     |
| <i>Candidatus Tremblaya</i><br><i>princeps</i>     | 0.047220904 | 6.32E-07                   | 1.00E-09                  | -9.302834067                     | Before     |
| <i>Bacillus sp. DU-106</i>                         | 0.047220904 | 6.76E-07                   | 1.00E-09                  | -9.400246906                     | Before     |
| <i>Campylobacter sp. RM12175</i>                   | 0.013874406 | 6.85E-07                   | 1.00E-09                  | -9.419602127                     | Before     |
| <i>Pseudomonas avellanae</i>                       | 0.047220904 | 6.92E-07                   | 1.00E-09                  | -9.433707587                     | Before     |
| <i>Bacillus pacificus</i>                          | 0.047220904 | 7.32E-07                   | 1.00E-09                  | -9.515326192                     | Before     |
| <i>Borrelia parkeri</i>                            | 0.013874406 | 8.31E-07                   | 1.00E-09                  | -9.6979173                       | Before     |
| <i>Nonlabens sp. MIC269</i>                        | 0.047220904 | 8.69E-07                   | 1.00E-09                  | -9.762971882                     | Before     |
| <i>Staphylococcus sp. AntiMn-1</i>                 | 0.013874406 | 1.00E-05                   | 1.00E-09                  | -13.29386436                     | Before     |

**Supplementary Table 9. SHRs for CRC incidence after PS matching with trimming.**

|                | Total        | Appendectomy |              |                              | Control      |              |                              | Adjusted SHR*<br>(95% CI) | <i>P</i> |
|----------------|--------------|--------------|--------------|------------------------------|--------------|--------------|------------------------------|---------------------------|----------|
|                | NO. of event | NO. of event | Person-years | Incidence rate**<br>(95% CI) | NO. of event | Person-years | Incidence rate**<br>(95% CI) |                           |          |
| CRC            | 698          | 310          | 424,176      | 73.1 (65.0-81.2)             | 388          | 976,844      | 39.7 (35.8-43.7)             | 1.730 (1.490-2.010)       | <0.001   |
| Age≤50         | 166          | 53           | 292,315      | 18.1 (13.3-23.0)             | 113          | 691,218      | 16.3 (13.3-19.4)             | 1.190 (0.848-1.660)       | 0.320    |
| Age>50         | 532          | 257          | 131,861      | 194.9 (171.1-218.7)          | 275          | 285,626      | 96.3 (84.9-107.7)            | 2.020 (1.710-2.396)       | <0.001   |
| Female         | 306          | 135          | 234,213      | 57.6 (47.9-67.4)             | 171          | 580,983      | 29.4 (25.0-33.8)             | 1.730 (1.380-2.170)       | <0.001   |
| Male           | 392          | 175          | 189,963      | 92.1 (78.5-105.8)            | 217          | 395,860      | 54.8 (47.5-62.1)             | 1.750 (1.440-2.130)       | <0.001   |
| Proximal colon | 168          | 85           | 422,576      | 20.1 (15.8-24.4)             | 83           | 974,150      | 8.5 (6.7-10.4)               | 2.210 (1.640-2.990)       | <0.001   |
| Distal colon   | 237          | 101          | 422,688      | 23.9 (19.2-28.6)             | 136          | 974,699      | 14 (11.6-16.3)               | 1.670 (1.290-2.150)       | <0.001   |
| Rectum         | 239          | 101          | 422,842      | 23.9 (19.2-28.5)             | 138          | 974,521      | 14.2 (11.8-16.5)             | 1.570 (1.210-2.020)       | <0.001   |
| Unspecific     | 54           | 23           | 422,200      | 5.4 (3.2-7.7)                | 31           | 973,629      | 3.2 (2.1-4.3)                | 1.560 (0.914-2.650)       | 0.100    |

\*Adjusted by Age, Gender, Diabetes mellitus, Hypertension, Hyperlipidemia, diabetes mellitus, hypertension, hyperlipidemia, congestive heart failure, rheumatic disease, dementia, liver disease (divided into mild, moderate, or severe liver disease according to the severity of portal hypertension), myocardial infarction, paraplegia, peptic ulcer, chronic pulmonary disease, chronic kidney disease, and stroke.

\*\*Per 10000 person-years.

CRC: colorectal cancer; CI: confidence interval; PS: propensity score; SHR: sub-distribution hazard ratio.

**Supplementary Table 10. Sensitivity analysis on assessing SHRs for cancer incidence after excluding individuals who had a diagnosis of cancer within 3 or 5 years after baseline.**

|         |        | Number of events |              | Adjusted SHR |                       |        |
|---------|--------|------------------|--------------|--------------|-----------------------|--------|
|         |        | Total            | Appendectomy | Control      | (95% CI) <sup>P</sup> |        |
| 3 years | CRC    | 550              | 227          | 323          | 1.560 (1.320-1.850)   | <0.001 |
|         | female | 227              | 94           | 133          | 1.600 (1.220-2.080)   | <0.001 |
|         | male   | 323              | 133          | 190          | 1.540 (1.240-1.920)   | <0.001 |
|         | <=50   | 146              | 44           | 102          | 1.120 (0.777-1.610)   | 0.540  |
|         | >50    | 404              | 183          | 221          | 1.852 (1.530-2.248)   | <0.001 |
| 5 years | CRC    | 454              | 180          | 274          | 1.490 (1.230-1.790)   | <0.001 |
|         | female | 188              | 78           | 110          | 1.650 (1.230-2.210)   | <0.001 |
|         | male   | 266              | 102          | 164          | 1.390 (1.090-1.780)   | 0.008  |
|         | <=50   | 131              | 37           | 94           | 1.040 (0.697-1.540)   | 0.860  |
|         | >50    | 323              | 143          | 180          | 1.815 (1.460-2.260)   | <0.001 |

\*Adjusted by Age, Gender, Diabetes mellitus, Hypertension, Hyperlipidemia, diabetes mellitus, hypertension, hyperlipidemia, congestive heart failure, rheumatic disease, dementia, liver disease (divided into mild, moderate, or severe liver disease according to the severity of portal hypertension), myocardial infarction, paraplegia, peptic ulcer, chronic pulmonary disease, chronic kidney disease, and stroke.

CRC: colorectal cancer; CI: confidence interval; SHR: subdistribution hazard ratio.



**Supplementary Table 11. Primers sequences in validation of the abundance of candidate bacteria by qPCR**

| <b>Bacteria</b>                   | <b>Sequences of primers</b> |                                 |
|-----------------------------------|-----------------------------|---------------------------------|
| Bacteroides vulgatus              | Forward                     | 5'-CATGAGTCCGCATGTTACAT-3'      |
|                                   | Reverse                     | 5'-ACCGTGTCTCAGTTCCAATGT-3'     |
| Bacteroides fragilis              | Forward                     | 5'-GGAATGATGTGGAAACATGTCAGTG-3' |
|                                   | Reverse                     | 5'-GAGTCCTCAGCATAACCTGTTAGTA-3' |
| Veillonella dispar                | Forward                     | 5'- GCGCAACCCCTATCTTATGT-3'     |
|                                   | Reverse                     | 5'-ATTGCTTCCGTCTATTAACCTCCC-3'  |
| Enterococcus hirae                | Forward                     | 5'-AACGCTTCTTTTTCCACCGGA-3'     |
|                                   | Reverse                     | 5'-TCAAAACCATGCGGTTTCGATTG-3'   |
| Lachnospiraceae bacterium Choco86 | Forward                     | 5'-GAATGACCGGTGAGTAATGTTCGC-3'  |
|                                   | Reverse                     | 5'- GAGTGCCCATCCTAATTGCTGG-3'   |
| Blautia sp. SC05B48               | Forward                     | 5'-AACCGAGTCTTTCCTTCGGG -3'     |
|                                   | Reverse                     | 5'- CTGGCAGTCTCCCCAGAGTG-3'     |
| Total bacteria                    | Forward                     | 5'-GCAGGCCTAACACATGCAAGTC-3'    |
|                                   | Reverse                     | 5'-CTGCTGCCTCCCGTAGGAGT-3'      |
